# Supplementary material for: A New qPCR Assay for the Rapid Diagnosis of Anthonomus grandis Subspecies
Source: Insects. 2023 Oct 31;14(11):845. doi: 10.3390/insects14110845 (PMC10671495; doi:10.3390/insects14110845)
Supplement: Supplementary file 1 [file insects-14-00845-s001.zip › Supplementary Material S1 - DNA QC & Fluoresence Analysis.xlsx]

## Sheet: Sensitivity Test
										IMMDL																									TAMU
										Rep 1								Rep 2								Rep 3								Final Det.	Rep 1					Rep 2					Rep 3
Sample#	Intake	Extraction ID	Subspecies	Origin	Target [DNA] ng/uL	Qubit [DNA~] ng/uL	IMMDL Actual [DNA~] ng/uL	TAMU Actual [DNA~] ng/uL	ICCDRU Actual [DNA~] ng/uL	Call	RFU1	RFU2	Cq1	mean Cq1	Cq2	mean Cq2	deltaCq	Call	RFU1	RFU2	Cq1	mean Cq1	Cq2	mean Cq2	deltaCq	Call	RFU1	RFU2	Cq1	mean Cq1	Cq2	mean Cq2	deltaCq		Call	RFU1	RFU2	Cq1	Cq2	Call	RFU1	RFU2	Cq1	Cq2	Call		RFU1	RFU2	Cq1
1	20210514-001-A-001	Sample # 34E = 76.4 ng/ul	A. g. grandis	USA, Texas, Knippa	0.05	76.4 ng/ul	0.0393	0.136	0.0294	BW	494	9533	45.94	45.94	29.54	29.54	16.4	BW	441	9828	38.74	38.74	29.01	29.01	9.73	BW	487	8664	36.5	36.5	28.95	28.95	7.55	BW	BW	34.12	5217.37	N/A	31.46	BW	45.03	5476.01	N/A	31.19	BW		94.04	5305.02	N/A
2	20210514-001-B-001	Sample # 34G = 57.2 ng/ul	A. g. grandis	USA, Texas, Knippa	0.05	57.2 ng/ul	0.0516	0.03	0.0294	BW	536	9233	44.52	44.52	29.1	29.1	15.42	BW	466	9022	37.74	37.74	28.26	28.26	9.48	BW	588	8853	34.48	34.48	28.27	28.27	6.21	BW	BW	41.24	5644.81	N/A	32.18	BW	50.82	5079.85	N/A	32.2	BW		52.52	2741.79	N/A
3	20210514-001-C-001	Sample # 34H = 78.6 ng/ul	A. g. grandis	USA, Texas, Knippa	0.05	78.6 ng/ul	0.0432	0.0132	0.252	BW	523	9707	45.11	45.11	28.57	28.57	16.54	BW	449	8532	37.7	37.7	28.05	28.05	9.65	BW	529	8352	35.31	35.31	28.02	28.02	7.29	BW	BW	38.65	5741.27	N/A	31.1	BW	54.97	5579.02	N/A	31.03	BW		30.13	4444.31	N/A
4	20210514-001-D-001	Sample # 36E = 62.2 ng/ul	A. g. grandis	USA, Texas, La Feria	0.05	62.2 ng/ul	0.0301	0.172	<0.02	BW	393	9529	N/A	0	29.56	29.56		BW	470	8069	37.82	37.82	29.09	29.09	8.73	BW	421	8274	37.84	37.84	28.82	28.82	9.02	BW	BW	11.83	3153.33	N/A	35.43	BW	20.59	3749.53	N/A	34.72	BW		18.88	3146.71	N/A
5	20210514-001-E-001	Sample # 36F = 62.0 ng/ul	A. g. grandis	USA, Texas, La Feria	0.05	62.0 ng/ul	0.0177	0.0936	0.0326	BW	481	10030	N/A	0	29.84	29.84		BW	386	8033	40.21	40.21	29.12	29.12	11.09	BW	452	8459	37.27	37.27	29.07	29.07	8.2	BW	BW	29.97	5034.6	N/A	31.52	BW	57.99	5645.22	N/A	31.46	BW		46.54	6101.01	N/A
6	20210514-001-A-001	Sample # 34E = 76.4 ng/ul	A. g. grandis	USA, Texas, Knippa	1	76.4 ng/ul	0.884	0.372	0.718	BW	630	10453	40.91	40.91	25.15	25.15	15.76	BW	558	8407	33.66	33.66	24.46	24.46	9.2	BW	605	8634	31.74	31.74	24.42	24.42	7.32	BW	BW	80.88	6229.78	N/A	25.81	BW	408.15	5682.92	18.68	25.89	BW		57.03	3425.63	N/A
7	20210514-001-B-001	Sample # 34G = 57.2 ng/ul	A. g. grandis	USA, Texas, Knippa	1	57.2 ng/ul	0.908	0.0644	0.706	BW	623	9751	41.27	41.27	25.33	25.33	15.94	BW	570	9526	33.64	33.64	24.45	24.45	9.19	BW	654	8933	31.44	31.44	24.44	24.44	7	BW	BW	100.9	6152	38	26.99	BW	87.29	6203.42	N/A	27	BW		244.45	4228.1	29.16
8	20210514-001-C-001	Sample # 34H = 78.6 ng/ul	A. g. grandis	USA, Texas, Knippa	1	78.6 ng/ul	0.902	0.142	0.478	BW	660	9846	39.79	39.79	24.88	24.88	14.91	BW	778	14036	31.52	31.52	24.37	24.37	7.15	BW	719	9099	30.24	30.24	24.09	24.09	6.15	BW	BW	159.21	6012.38	35.61	26.24	BW	152.36	6023.62	37.28	26.24	BW		304.51	5621.41	27.56
9	20210514-001-D-001	Sample # 36E = 62.2 ng/ul	A. g. grandis	USA, Texas, La Feria	1	62.2 ng/ul	0.618	0.726	0.538	BW	640	9513	40.93	40.93	25.69	25.69	15.24	No Call	-2.24	1.19	N/A	0	N/A	0	N/A	BW	728	8961	30.67	30.67	24.9	24.9	5.77	BW	BW	179.63	5784.77	35.71	26.41	BW	90.94	6185.59	N/A	26.44	BW		178.3	5305.58	34.44
10	20210514-001-E-001	Sample # 36F = 62.0 ng/ul	A. g. grandis	USA, Texas, La Feria	1	62.0 ng/ul	0.706	0.828	0.638	BW	551	9719	43.44	43.44	25.51	25.51	17.93	BW	619	9017	32.76	32.76	24.95	24.95	7.81	BW	595	8118	32.42	32.42	25	25	7.42	BW	BW	155.21	5369.19	35.75	26.91	BW	332.31	6310.13	19.4	26.72	BW		223.09	5552.89	33.46
11	20210514-001-A-001	Sample # 34E = 76.4 ng/ul	A. g. grandis	USA, Texas, Knippa	5	76.4 ng/ul	6.86	4.08	4.08	BW	543	9150	43.85	43.85	21	21	22.85	BW	631	8620	29.34	29.34	20.14	20.14	9.2	BW	661	8381	27.69	27.69	20.15	20.15	7.54	BW	BW	196.41	6985.65	34.51	22.85	BW	200.37	6862.91	34.11	22.91	BW		20.07	1810.57	N/A
12	20210514-001-B-001	Sample # 34G = 57.2 ng/ul	A. g. grandis	USA, Texas, Knippa	5	57.2 ng/ul	6.26	3.32	3.54	BW	685	9090	38.8	38.8	21.06	21.06	17.74	BW	464	7720	33.33	33.33	20.37	20.37	12.96	BW	411	7556	33.84	33.84	20.32	20.32	13.52	BW	BW	235.09	6628.39	32.84	22.95	BW	195.32	6607.31	34.4	23.02	BW		226.42	8071.31	33.83
13	20210514-001-C-001	Sample # 34H = 78.6 ng/ul	A. g. grandis	USA, Texas, Knippa	5	78.6 ng/ul	6.92	4.2	4.52	BW	535	10080	43.76	43.76	21.14	21.14	22.62	BW	477	8969	33.41	33.41	20.38	20.38	13.03	BW	492	8616	31.32	31.32	20.37	20.37	10.95	BW	BW	296.53	6642.38	30.08	23.06	BW	238.52	6731.68	32.75	23.08	BW		175.79	5675.26	34.36
14	20210514-001-D-001	Sample # 36E = 62.2 ng/ul	A. g. grandis	USA, Texas, La Feria	5	62.2 ng/ul	5.94	2.76	3.14	BW	490	10637	N/A	0	21.08	21.08		BW	482	8803	32.71	32.71	20.33	20.33	12.38	BW	577	9284	29.29	29.29	20.18	20.18	9.11	BW	BW	175.09	5416.24	35.51	23.17	BW	221.11	6503.44	33.22	23.2	BW		173.22	5694.68	33.99
15	20210514-001-E-001	Sample # 36F = 62.0 ng/ul	A. g. grandis	USA, Texas, La Feria	5	62.0 ng/ul	5.44	3.12	3.54	BW	702	10601	37.89	37.89	20.79	20.79	17.1	BW	664	9159	28.95	28.95	20.15	20.15	8.8	BW	599	9486	29.35	29.35	20.03	20.03	9.32	BW	BW	200.15	6425.23	35.51	23.71	BW	175.29	6066.28	34.55	23.88	BW		191.55	5880.85	35.13
16	20210514-001-A-001	Sample # 34E = 76.4 ng/ul	A. g. grandis	USA, Texas, Knippa	25	76.4 ng/ul	36	25.8	25.8	BW	707	10612	38.63	38.63	23	23	15.63	BW	676	9255	30.78	30.78	22.22	22.22	8.56	BW	793	9284	28.44	28.44	22.13	22.13	6.31	BW	BW	444.73	7280.55	20.03	20.05	BW	205.6	5975	32.39	20.3	BW		514.42	5654.89	3.02
17	20210514-001-B-001	Sample # 34G = 57.2 ng/ul	A. g. grandis	USA, Texas, Knippa	25	57.2 ng/ul	36.6	21.8	23.4	BW	692	9431	38.77	38.77	23.34	23.34	15.43	BW	670	9416	30.89	30.89	22.54	22.54	8.35	BW	732	9475	29.06	29.06	22.36	22.36	6.7	BW	BW	68.09	7285.6	N/A	20.15	BW	76.72	5846.03	N/A	20.37	BW		217.84	5624.59	31.78
18	20210514-001-C-001	Sample # 34H = 78.6 ng/ul	A. g. grandis	USA, Texas, Knippa	25	78.6 ng/ul	28.4	29.6	31.4	BW	667	9613	39.37	39.37	23.13	23.13	16.24	BW	698	9172	30.37	30.37	22.33	22.33	8.04	BW	644	8921	30.21	30.21	22.18	22.18	8.03	BW	BW	174.98	6184.08	33.95	19.98	BW	167.27	5099.66	33.58	20.02	BW		320.35	5500.72	27.84
19	20210514-001-D-001	Sample # 36E = 62.2 ng/ul	A. g. grandis	USA, Texas, La Feria	25	62.2 ng/ul	32.2	16.6	16.9	BW	619	9892	40.76	40.76	23.46	23.46	17.3	BW	706	9346	30.6	30.6	22.61	22.61	7.99	BW	622	8295	30.15	30.15	22.65	22.65	7.5	BW	BW	261.42	6662.62	30.76	20.38	BW	83.63	5685.7	N/A	20.54	No Call		-7.67	-0.31	N/A
20	20210514-001-E-001	Sample # 36F = 62.0 ng/ul	A. g. grandis	USA, Texas, La Feria	25	62.0 ng/ul	27	20.6	22.8	BW	630	9352	40.83	40.83	23.38	23.38	17.45	BW	640	8487	31.27	31.27	22.6	22.6	8.67	BW	583	7991	31.11	31.11	22.59	22.59	8.52	BW	BW	285.84	6692.5	29.94	20.28	BW	183.41	6020.84	35.48	20.29	BW		320.25	8809.33	28.59
21	RX200306-001	20171121-001-B-001	A. g. thurberiae	USA, New Mexico, Antelope Wells, Hidalgo County, 270 Acres	0.05	35.2	0.0155	0.0332	0.0494	TW	7912	962	33.52	33.52	45.22	45.22	11.7	TW	7509	980	31.67	31.67	39.18	39.18	7.51	TW	8143	1069	31.9	31.9	38.81	38.81	6.91	TW	TW	2626.6	614.12	32.51	37.22	TW	2571.24	588.1	32.65	37.54	TW		2398.72	542.62	32.97
22	RX200306-004	20171121-001-B-001	A. g. thurberiae	USA, New Mexico, Antelope Wells, Hidalgo County, 270 Acres	0.05	40.1333	0.01	0.0248	0.127	TW	9242	1078	33.87	33.87	43.97	43.97	10.1	TW	8109	1059	31.22	31.22	38.63	38.63	7.41	TW	7510	777	35.25	35.25	42.34	42.34	7.09	TW	TW	2573.7	608.65	32.05	36.98	TW	2910.48	670.11	32.04	36.77	TW		2692.21	614.31	31.97
23	RX210330-001	20171121-001-F-001	A. g. thurberiae	USA, New Mexico, Antelope Wells, Hidalgo County, 270 Acres	0.05	36.2	0.0419	0.0276	0.058	TW	8627	962	35.11	35.11	45.18	45.18	10.07	TW	8349	1098	32.13	32.13	38.85	38.85	6.72	TW	8110	873	33.96	33.96	40.96	40.96	7	TW	TW	2421.62	547.94	32.65	37.7	TW	2710.44	638.75	32.17	37.01	TW		2388.81	540.5	32.51
24	RX210330-005	20171121-001-G-001	A. g. thurberiae	USA, New Mexico, Antelope Wells, Hidalgo County, 270 Acres	0.05	40.8	0.0419	0.0191	0.0586	TW	8449	789	35.97	35.97	N/A	0		TW	7117	878	32.35	32.35	40.28	40.28	7.93	TW	8840	981	32.9	32.9	40.01	40.01	7.11	TW	TW	2204.86	517.12	33.19	38.02	TW	2265.23	498.1	33.48	38.41	TW		2352.7	513.35	32.75
25	RX210330-006	20171121-001-G-001	A. g. thurberiae	USA, New Mexico, Antelope Wells, Hidalgo County, 270 Acres	0.05	22.4	0.0276	0.0358	0.0648	BW	2160	7351	38.12	38.12	18.99	18.99	19.13	TW	8073	1145	33.97	33.97	39.93	39.93	5.96	TW	7481	732	34.93	34.93	42.69	42.69	7.76	TW	TW	2845.04	651	32.05	37	TW	2318.58	531.19	33.51	38.19	TW		2258.86	497.62	33.04
26	RX200306-001	20171121-001-B-001	A. g. thurberiae	USA, New Mexico, Antelope Wells, Hidalgo County, 270 Acres	1	35.2	1.17	0.664	1.29	HET	6314	7780	2.91	2.91	7.41	7.41	4.5	TW	9433	1288	28.98	28.98	35.97	35.97	6.99	TW	9081	1011	30.42	30.42	38.63	38.63	8.21	TW	TW	3082.13	671.01	29.06	35.38	TW	3590.32	940.41	28.46	33.51	TW		3407.61	894.82	28.1
27	RX200306-004	20171121-001-B-001	A. g. thurberiae	USA, New Mexico, Antelope Wells, Hidalgo County, 270 Acres	1	40.1333	1.36	0.83	1.7	HET	4978	6734	2.87	2.87	6.52	6.52	3.65	TW	9749	1333	28.57	28.57	35.6	35.6	7.03	HET	7528	8308	9.27	9.27	10.07	10.07	0.8	Inconclusive	TW	3579.29	934.39	28.33	33.47	TW	3739.6	983.79	28.14	32.97	TW		3389.93	898.34	28.1
28	RX210330-001	20171121-001-F-001	A. g. thurberiae	USA, New Mexico, Antelope Wells, Hidalgo County, 270 Acres	1	36.2	1.28	0.754	1.37	HET	3735	5665	1.39	1.39	3.94	3.94	2.55	TW	9266	1222	29.12	29.12	36.35	36.35	7.23	HET	12690	6411	8.3	8.3	11.43	11.43	3.13	Inconclusive	TW	3864.08	1032.56	28.15	33.1	TW	3681.92	938.94	28.29	33.51	TW		3101.25	819.82	27.5
29	RX210330-005	20171121-001-G-001	A. g. thurberiae	USA, New Mexico, Antelope Wells, Hidalgo County, 270 Acres	1	40.8	1.57	0.65	1.68	TW	9231	1382	27.72	27.72	39.41	39.41	11.69	TW	8098	1249	26.8	26.8	34.61	34.61	7.81	TW	8312	1319	26.44	26.44	33.97	33.97	7.53	TW	TW	3865.27	1008.37	28.03	33	TW	3954.81	996.19	28.5	33.4	TW		3548.34	858.81	29.14
30	RX210330-006	20171121-001-G-001	A. g. thurberiae	USA, New Mexico, Antelope Wells, Hidalgo County, 270 Acres	1	22.4	0.55	0.604	1.55	TW	9676	1445	28.01	28.01	39.17	39.17	11.16	TW	8598	1289	27.22	27.22	34.9	34.9	7.68	TW	8948	1365	26.96	26.96	34.19	34.19	7.23	TW	TW	3760.68	936.69	28.52	33.68	TW	3782.62	944.11	28.72	33.7	TW		3290.92	859.73	28.53
31	RX200306-001	20171121-001-B-001	A. g. thurberiae	USA, New Mexico, Antelope Wells, Hidalgo County, 270 Acres	5	35.2	5.12	2.46	3.74	TW	10304	1604	25.37	25.37	36.83	36.83	11.46	TW	8859	1441	24.43	24.43	32.18	32.18	7.75	TW	9727	1578	24.05	24.05	31.34	31.34	7.29	TW	TW	4527.07	1353.13	26.36	30.88	TW	4002.3	1185.15	26.36	31.01	TW		3356.41	976.11	26.38
32	RX200306-004	20171121-001-B-001	A. g. thurberiae	USA, New Mexico, Antelope Wells, Hidalgo County, 270 Acres	5	40.1333	5.56	3.36	4.56	TW	10306	1559	25.74	25.74	37.39	37.39	11.65	TW	9200	1458	24.95	24.95	32.64	32.64	7.69	TW	8824	1398	24.49	24.49	32.44	32.44	7.95	TW	TW	4519.7	1333.26	25.91	30.66	TW	4048.48	1196.72	25.73	30.79	TW		3582.26	1038.26	25.73
33	RX210330-001	20171121-001-F-001	A. g. thurberiae	USA, New Mexico, Antelope Wells, Hidalgo County, 270 Acres	5	36.2	5.4	3.24	3.24	TW	9773	1517	25.24	25.24	37.36	37.36	12.12	TW	8954	1438	24.22	24.22	32.07	32.07	7.85	TW	8693	1433	23.98	23.98	31.77	31.77	7.79	TW	TW	4538.53	1347.3	26.18	30.73	TW	3273.11	1001.38	24.97	30.61	TW		3243.23	904.24	26.19
34	RX210330-005	20171121-001-G-001	A. g. thurberiae	USA, New Mexico, Antelope Wells, Hidalgo County, 270 Acres	5	40.8	7.18	3.6	3.6	TW	9658	1446	24.98	24.98	37.91	37.91	12.93	TW	8887	1417	24.15	24.15	31.93	31.93	7.78	TW	9197	1470	23.67	23.67	31.44	31.44	7.77	TW	TW	3998.94	1158.01	25.38	30.58	TW	4059.39	1131.65	25.96	31.24	No Call		28.56	31.9	N/A
35	RX210330-006	20171121-001-G-001	A. g. thurberiae	USA, New Mexico, Antelope Wells, Hidalgo County, 270 Acres	5	22.4	3.06	3.82	3.82	TW	6024	456	29.65	29.65	N/A	0		TW	9127	1315	25.03	25.03	33.23	33.23	8.2	TW	9086	1333	24.83	24.83	32.9	32.9	8.07	TW	TW	4078.82	1247.25	25.99	30.68	TW	3725	1085.05	26.76	31.79	TW		3999.56	1097.69	26.85
36	RX200306-001	20171121-001-B-001	A. g. thurberiae	USA, New Mexico, Antelope Wells, Hidalgo County, 270 Acres	25	35.2	32.2	13.6	11.7	TW	9022	1167	25.98	25.98	41.27	41.27	15.29	TW	9249	1207	24.12	24.12	33.32	33.32	9.2	TW	8375	1112	25.38	25.38	34.75	34.75	9.37	TW	TW	4464.92	1185.79	25.23	30.65	TW	3933.55	1061.37	25.13	30.69	No Call		1.22	-1.01	N/A
37	RX200306-004	20171121-001-B-001	A. g. thurberiae	USA, New Mexico, Antelope Wells, Hidalgo County, 270 Acres	25	40.1333	29.8	18.5	18.5	TW	9614	1389	26.34	26.34	39.02	39.02	12.68	TW	8362	1301	24.34	24.34	32.87	32.87	8.53	TW	9208	1384	25.25	25.25	33.04	33.04	7.79	TW	TW	4089.44	1055.37	25.35	30.91	TW	3677.73	967.47	25.72	31.75	TW		3618.99	937.39	25.72
38	RX210330-001	20171121-001-F-001	A. g. thurberiae	USA, New Mexico, Antelope Wells, Hidalgo County, 270 Acres	25	36.2	27.2	15.3	15.3	TW	9609	1328	24.57	24.57	38.92	38.92	14.35	TW	9259	1338	23.6	23.6	32.15	32.15	8.55	TW	9506	1384	23.27	23.27	31.68	31.68	8.41	TW	TW	4143.54	1066.59	24.91	30.62	TW	3971.16	965.62	25.45	31.36	No Call		0.94	2.63	N/A
39	RX210330-005	20171121-001-G-001	A. g. thurberiae	USA, New Mexico, Antelope Wells, Hidalgo County, 270 Acres	25	40.8	28.2	15.4	15.4	TW	9914	1168	25.48	25.48	41.22	41.22	15.74	TW	9341	1067	24.49	24.49	34.95	34.95	10.46	TW	9247	1076	24.32	24.32	34.56	34.56	10.24	TW	TW	4209.88	965.45	25.7	31.72	TW	3966.04	915.39	25.47	31.85	TW		3303.85	761.61	25.72
40	RX210330-006	20171121-001-G-001	A. g. thurberiae	USA, New Mexico, Antelope Wells, Hidalgo County, 270 Acres	25	22.4	14.1	17.4	17.4	TW	10602	1508	24.3	24.3	37.1	37.1	12.8	TW	9537	1419	23.53	23.53	31.67	31.67	8.14	TW	9735	1435	23.33	23.33	31.37	31.37	8.04	TW	TW	4388.62	1088.27	25.19	30.76	TW	3497.77	881.41	25.36	31.66	TW		3448.4	878.84	25.4
41	38E		BW +C	USA, Texas, Dilley	5	55.2	7.66	3.28	3.62	BW	628	9283	40.99	40.99	24.27	24.27	16.72	BW	691	9316	31.15	31.15	23.45	23.45	7.7	BW	652	8495	30.14	30.14	23.47	23.47	6.67	BW	BW	182.86	7086.6	34.48	24.08	BW	71.69	6011.07	N/A	24.05	BW		164.89	5116.65	34.92
42	38F		BW +C	USA, Texas, Dilley	5	71.6	4.74	4.56	4.22	BW	371	8848	N/A	0	35.87	35.87		BW	276	7955	44.99	44.99	35.96	35.96	9.03	BW	314	7790	42.52	42.52	35.08	35.08	7.44	BW	BW	18.37	1971.72	N/A	36.97	BW	16.72	1313.78	N/A	37.74	No Call		4.42	4.68	N/A
43	38G		BW +C	USA, Texas, Dilley	5	59.6	5.78	7.82	7.82	BW	649	12674	40.41	40.41	23.44	23.44	16.97	BW	716	9259	29.92	29.92	22.27	22.27	7.65	BW	796	9093	28.52	28.52	22.23	22.23	6.29	BW	BW	179.05	5915.13	34.81	23.17	BW	203.79	5979.45	35.09	23.26	BW		240.64	5927.72	32.73
44	RX200306-002	20171121-001-B-001	TW +C	USA, New Mexico, Antelope Wells, Hidalgo County, 270 Acres	5	26.8	5.94	8.9	6.28	TW	9328	1531	25.43	25.43	37.29	37.29	11.86	TW	7715	1072	25.17	25.17	34.72	34.72	9.55	TW	8621	1450	24.4	24.4	32	32	7.6	TW	TW	2645.69	763.51	24.21	31.37	TW	4142.32	1225.52	25.67	30.64	TW		3499.85	981.29	25.87
45	RX200306-005	20171121-001-B-001	TW +C	USA, New Mexico, Antelope Wells, Hidalgo County, 270 Acres	5	22.3	5.1	8.64	4.74	TW	9924	1310	25.74	25.74	39.43	39.43	13.69	TW	9384	1243	24.81	24.81	33.53	33.53	8.72	TW	9510	1289	24.55	24.55	32.97	32.97	8.42	TW	TW	3213.37	799.65	25.64	32.52	TW	3726.52	917.05	26.44	32.41	TW		3400.51	784.85	26.87
46	RX210330-003	20171121-001-G-001	TW +C	USA, New Mexico, Antelope Wells, Hidalgo County, 270 Acres	5	14.2	3.66	8.6	6.2	TW	10880	1715	23.91	23.91	35.45	35.45	11.54	TW	10056	1561	23.24	23.24	30.93	30.93	7.69	TW	9641	1602	22.9	22.9	30.33	30.33	7.43	TW	TW	4235.42	1263.97	24.58	29.81	TW	4058.06	1207.6	24.48	29.95	TW		4034.45	1158.52	24.99
47			NTC							No Call	140	264	N/A	0	N/A	0		No Call	-0.388	4.9	N/A	0				No Call	33.3	20.6	N/A	0	N/A	0						N/A
[truncated: 24 more columns]

## Sheet: Non-target Specificity Test
									Mission Lab																			A&M							ARS
									Rep 1						Rep 2						Rep 3						Final Determination	Rep 1		Rep 2		Rep 3		Final Determination	Rep 1						Rep 2						Rep 3
Tube #	Sample#	Intake/ID#	Extraction ID	Species	Origin	Qubit [DNA~] ng/uL	Actual [DNA~] ng/uL	amount in aliquot (ng)	Call	RFU	Cq1	mean cq1	Cq2	mean cq2	Call	RFU	Cq1	mean cq1	Cq2	mean cq2	Call	RFU	Cq1	mean cq1	Cq2	mean cq2		Call	RFU	Call	RFU	Call	RFU		Call	RFU	Cq 1	mean Cq 1	Cq 2	mean Cq 2	Call	RFU	Cq 1	mean Cq 1	Cq 2	mean Cq 2	Call	RFU	Cq 1
1	AM1	20081030-001-C-001		A. musculus	USA, New Jersey, Reeves Farm	19.2	940.8	156.864	No Call	-20.2	N/A	0	N/A	0	No Call	495	6	6	N/A	0	No Call	-7.15667	N/A	0	N/A	0	Inconclusive	No Call	78.35	No Call	58.63	No Call	1.47	Inconclusive	No Call						No Call						No Call
2	AM2	20081030-001-B-003		A. musculus	USA, New Jersey, Reeves Farm	27.6	1352.4	225.492	No Call	750	3.99	3.99	N/A	0	No Call	264	26.57	26.57	28.6	28.6	No Call	-7.92395	N/A	0	N/A	0	Inconclusive	No Call	9.87	No Call	119.31	No Call	1.96	Inconclusive	No Call						No Call						No Call
3	AM3	20081030-001-C-003		A. musculus	USA, New Jersey, Reeves Farm	21.6	1058.4	176.472	No Call	720	5.55	5.55	N/A	0	No Call	568	4.04	4.04	N/A	0	No Call	488.605	7.49	7.49	N/A	0	Inconclusive	No Call	3.98	No Call	6.59	No Call	77.44	Inconclusive	No Call						No Call						No Call
4	AM4	20081030-001-C-002		A. musculus	USA, New Jersey, Reeves Farm	36.8	1803.2	300.656	No Call	17.6	N/A	0	N/A	0	No Call	5.91	N/A	0	N/A	0	No Call	79.7282	14.55	14.55	10.12	10.12	Inconclusive	No Call	6.98	No Call	25.39	No Call	-4.59	Inconclusive	No Call						No Call						No Call
5	AP1	20151103-001-A-001		A. peninsularis	USA, Arizona, Chandler	78.2	3831.8	638.894	TW	13797	25.2	25.2	28.08	28.08	TW	12193	30.14	30.14	32.18	32.18	TW	7588.2	30.5	30.5	32.28	32.28	TW	TW	1208.41	TW	1347.07	TW	1389.3	TW	TW	9282	25.292	25.1977	27.3997	27.3195	TW	10605	25.2078	25.1977	27.3042	27.3195	TW	10807	25.0932
6	AP2	20151103-001-B-001		A. peninsularis	USA, Arizona, Chandler	53	2597	433.01	TW	13674	26.16	26.16	28.66	28.66	TW	13541	25.29	25.29	27.35	27.35	TW	7731.22	29.29	29.29	31.24	31.24	TW	TW	1436.06	TW	1222.52	TW	1330.06	TW	TW	9826	25.2634	25.2522	27.4543	27.3919	TW	10721	25.0706	25.2522	27.118	27.3919	TW	10927	25.4225
7	AE1	20081030-001-A-003		A. eugenii	USA, Florida, University of Florida	46.4	2273.6	379.088	No Call	670	9.37	9.37	N/A	0	No Call	17.2	N/A	0	N/A	0	No Call	591.589	7.37	7.37	N/A	0	Inconclusive	No Call	112.96	No Call	8.77	No Call	4.18	Inconclusive	No Call						No Call						No Call
8	AE2	20081030-001-A-005		A. eugenii	USA, Florida, University of Florida	57.6	2822.4	470.592	BW	2113	40.43	40.43	9.25	9.25	HET	9405	6.01	6.01	6.07	6.07	No Call	-5.66518	N/A	0	N/A	0	Inconclusive	No Call	215.45	No Call	131.31	No Call	7.88	Inconclusive	No Call						No Call						No Call
9	AE3	20081030-001-A-004		A. eugenii	USA, Florida, University of Florida	43.6	2136.4	356.212	No Call	-9	N/A	0	N/A	0	No Call	16.6	N/A	0	N/A	0	No Call	50.5193	N/A	0	24.6	24.6	Inconclusive	No Call	-7.08	No Call	63.22	No Call	7.73	Inconclusive	No Call						No Call						No Call
10	AF2	20210416-001-A-001		A. fulvus	USA, Texas, Brazos County	90	4410	735.3	TW	2603	41.62	41.62	44.26	44.26	No Call	17	N/A	0	N/A	0	No Call	25.5233	N/A	0	N/A	0	Inconclusive	No Call	12.32	No Call	7.39	No Call	96.75	Inconclusive	No Call						No Call						No Call
11	AF4	20210416-001-A-001		A. fulvus	USA, Texas, Brazos County	103	5047	841.51	No Call	12.6	N/A	0	N/A	0	No Call	3.77	N/A	0	35.29	35.29	No Call	386.767	15.96	15.96	21.23	21.23	Inconclusive	No Call	81.7	No Call	3.64	No Call	2.51	Inconclusive	No Call						No Call						No Call
12	AF5	20210416-001-A-001		A. fulvus	USA, Texas, Brazos County	94.2	4615.8	769.614	No Call	124	N/A	0	N/A	0	No Call	25.4	N/A	0	19.25	19.25	No Call	208.636	21.12	21.12	25.23	25.23	Inconclusive	No Call	6.65	No Call	12.44	No Call	5.84	Inconclusive	No Call						No Call						No Call
13	AF12	20210416-001-A-001		A. fulvus	USA, Texas, Brazos County	89.4	4380.6	730.398	TW	7013	38.11	38.11	40.64	40.64	TW	6648	37.28	37.28	39.33	39.33	TW	2848.5	39.19	39.19	41.49	41.49	TW	No Call	81.21	No Call	-3.21	No Call	7.69	Inconclusive	No Call						No Call						No Call
14	AF14	20210416-001-A-001		A. fulvus	USA, Texas, Brazos County	80.8	3959.2	660.136	No Call	23	N/A	0	N/A	0	No Call	99.3	45.64	45.64	N/A	0	No Call	279.356	43.31	43.31	N/A	0	Inconclusive	No Call	2.11	No Call	-4.68	No Call	78.14	Inconclusive	No Call						No Call						No Call
15	RL2			Rhyssomatus lineaticollis	USA, Wisconsin, Fat Elephant Farm, mixed & collected 6/18/19 from A. incarnata	45.8	2244.2	374.186	No Call	-3.82	N/A	0	N/A	0	No Call	3.62	N/A	0	N/A	0	No Call	160.06	19.25	19.25	19.09	19.09	Inconclusive	No Call	2.81	No Call	59.96	No Call	123.14	Inconclusive	No Call						No Call						No Call
16	RL4			Rhyssomatus lineaticollis	USA, Wisconsin, Fat Elephant Farm, mixed & collected 6/18/19 from A. incarnata	40	1960	326.8	No Call	-31.4	N/A	0	N/A	0	No Call	12.6	N/A	0	N/A	0	No Call	336.64	9.48	9.48	N/A	0	Inconclusive	No Call	1.59	No Call	71.12	No Call	4.28	Inconclusive	No Call						No Call						No Call
17	1	X0275113		A. townsendi	Mexico, Chiapas, 11 kilometers N Mapastepec	9.24	175.56	29.2908	No Call	10.8	N/A	0	40.65	40.65	No Call	44.3	N/A	0	37.29	37.29	No Call	329.233	9.79	9.79	37.58	37.58	Inconclusive	No Call	183.39	No Call	114.78	No Call	96.68	Inconclusive	No Call						No Call						No Call
18	2	X0274814		A. townsendi	Mexico, Chiapas, Cintalapa, 9 kilometers N Nuevo Tenochtitlan	8.96	170.24	28.4032	No Call	269	22.91	22.91	26.14	26.14	No Call	152	37.24	37.24	40.95	40.95	No Call	859.726	12.98	12.98	37.1	37.1	Inconclusive	No Call	48.34	No Call	20.89	No Call	58.8	Inconclusive	No Call						No Call						No Call
19	3	X0273526		A. townsendi	Mexico, Chiapas, Cintalapa, 9 kilometers N Nuevo Tenochtitlan	6.38	121.22	20.2246	No Call	531	21.76	21.76	39.44	39.44	No Call	176	31.72	31.72	40.55	40.55	No Call	-0.398391	N/A	0	41.76	41.76	Inconclusive	No Call	64.51	No Call	86.47	No Call	79.04	Inconclusive	No Call						No Call						No Call
20	9	X0275136		A. townsendi	Mexico, Chiapas, 30 kilometers N Domingo Chanona	10.3	195.7	32.651	No Call	401	21.73	21.73	40.83	40.83	No Call	184	35.01	35.01	39.53	39.53	No Call	211.684	24.14	24.14	38.73	38.73	Inconclusive	No Call	117.09	No Call	89.64	No Call	91.94	Inconclusive	No Call						No Call						No Call
21	10	X0274632		A. townsendi	Mexico, Chiapas, Cintalapa, 9 kilometers N Nuevo Tenochtitlan	9.16	174.04	29.0372	No Call	287	24.08	24.08	N/A	0	No Call	81.1	N/A	0	N/A	0	No Call	140.319	29.94	29.94	25.14	25.14	Inconclusive	No Call	0.75	No Call	-4.36	No Call	-1.26	Inconclusive	No Call						No Call						No Call
22	11	X0417783		A. palmeri	Mexico, Chiapas, Lagunas de Montebello National Park	7.12	135.28	22.5704	No Call	-5.65	N/A	0	N/A	0	No Call	-8.74	N/A	0	N/A	0	No Call	191.183	18.06	18.06	23.4	23.4	Inconclusive	No Call	-4.78	No Call	0.52	No Call	3.82	Inconclusive	No Call						No Call						No Call
23	16	X0417078		A. palmeri	Mexico, Chiapas, Lagunas de Montebello, Laguna Cinco Lagos	5.8	110.2	18.386	No Call	680	9.61	9.61	N/A	0	No Call	115	41.45	41.45	N/A	0	No Call	607.419	12.45	12.45	15.82	15.82	Inconclusive	No Call	55.71	No Call	90.17	No Call	6.11	Inconclusive	No Call						No Call						No Call
24	17	X0411903		A. palmeri	Mexico, Chiapas, Laguna Cinco	6.8	129.2	21.556	No Call	-39.3	N/A	0	N/A	0	No Call	519	12.85	12.85	15.55	15.55	No Call	192.342	15.54	15.54	19.79	19.79	Inconclusive	No Call	8.84	No Call	7.44	No Call	0.5	Inconclusive	No Call						No Call						No Call
25	18	X0417778		A. palmeri	Mexico, Chiapas, Laguna Cinco	6.72	127.68	21.3024	No Call	3.33	N/A	0	N/A	0	No Call	-1.32	N/A	0	N/A	0	No Call	145.862	30.76	30.76	23.46	23.46	Inconclusive	No Call	17.02	No Call	8.19	No Call	-0.58	Inconclusive	No Call						No Call						No Call
26	19	X0418890		A. palmeri	Mexico, Chiapas, near Cinco Lagos, Lagunas de Montebello	5.58	106.02	17.6886	No Call	300	23.51	23.51	N/A	0	No Call	-9.86	N/A	0	N/A	0	No Call	115.126	27.53	27.53	24.17	24.17	Inconclusive	No Call	3.39	No Call	2.35	No Call	-1.53	Inconclusive	No Call						No Call						No Call
27	22	X0269202	9202	A. hunteri	Mexico, Campeche, 6 miles N Escarcega	9.62	182.78	30.4954	No Call	336	22.21	22.21	35.83	35.83	No Call	308	19.41	19.41	27.43	27.43	No Call	104.644	36.63	36.63	N/A	0	Inconclusive	No Call	0.44	No Call	4.29	No Call	-3.21	Inconclusive	No Call						No Call						No Call
28	25	X0269001	9001	A. hunteri	Mexico, Quintana Roo, 39 miles S Felipe Carrillo Puerto	10.8	205.2	34.236	No Call	194	32.88	32.88	32.84	32.84	BW	158	44.3	44.3	38.74	38.74	No Call	42.8099	N/A	0	43.65	43.65	Inconclusive	No Call	1.65	No Call	-2.07	No Call	0.46	Inconclusive	No Call						No Call						No Call
29	26	X0268863	8863	A. hunteri	Mexico, Quintana Roo, 4 miles S Felipe Carrillo Puerto	6.68	126.92	21.1756	No Call	417	18.46	18.46	32.05	32.05	BW	80.7	N/A	0	40.89	40.89	No Call	179.647	25.68	25.68	28.61	28.61	Inconclusive	No Call	98.97	No Call	6.82	No Call	4.94	Inconclusive	No Call						No Call						No Call
30	27	X0268799	8799	A. hunteri	Mexico, Tabasco, 38 miles W Cardenas	13.6	258.4	43.112	BW	131	45.86	45.86	41.07	41.07	No Call	229	26.51	26.51	21.97	21.97	No Call	115.352	34.01	34.01	N/A	0	Inconclusive	No Call	175.86	No Call	273.74	BW	982.96	Inconclusive	No Call						No Call						No Call
31	28	X0268907	8907	A. hunteri	Mexico, Tabasco, 8 miles W, 3 miles N Cardenas	14.5	275.5	45.965	No Call	136	44.25	44.25	N/A	0	No Call	130	37.74	37.74	45.8	45.8	No Call	159.918	19.48	19.48	N/A	0	Inconclusive	No Call	56.78	No Call	108.25	No Call	88.4	Inconclusive	No Call						No Call						No Call
32	42	X1562030	2030	A. peninsularis	USA, California, San Bernardino, 2 miles NW Yucca Valley, Burns Pinon Bridge Reserve	5.46	103.74	17.3082	No Call	128	43.07	43.07	N/A	0	No Call	335	19.85	19.85	24.04	24.04	No Call	-64.3622	N/A	0	N/A	0	Inconclusive	No Call	-1.93	No Call	4.08	No Call	7.01	Inconclusive	No Call						No Call						No Call
33	33	X0276860	6860	A. texanus	Mexico, Chihuahua, 6 miles WSW Jimenez	21.6	410.4	68.472	No Call	725	17.33	17.33	31.04	31.04	No Call	9.84	N/A	0	N/A	0	No Call	201.776	17.5	17.5	21.66	21.66	Inconclusive	No Call	-1.18	No Call	3.75	No Call	82.2	Inconclusive	No Call						No Call						No Call
34	35	X0275238	5238	A. texanus	Mexico, Hidalgo, Lagunilla	66.8	1269.2	211.756	No Call	-4.13	N/A	0	N/A	0	No Call	10.1	N/A	0	N/A	0	No Call	158.617	25.82	25.82	24.39	24.39	Inconclusive	No Call	2.44	No Call	5.57	No Call	6.05	Inconclusive	No Call						No Call						No Call
35	37	X0274687	4687	A. texanus	USA, Texas, Big Bend National Park, Basin	95	1805	301.15	No Call	92.6	N/A	0	N/A	0	No Call	59.7	N/A	0	24.45	24.45	No Call	432.297	18.69	18.69	18.79	18.79	Inconclusive	No Call	94.91	No Call	-2.01	No Call	-0.77	Inconclusive	No Call						No Call						No Call
36	38	X0273662	3662	A. texanus	USA, Texas, Jeff Davis, 9.8 miles S Kent	44.4	843.6	140.748	No Call	323	26.41	26.41	N/A	0	No Call	225	28.14	28.14	26.67	26.67	No Call	227.923	18.89	18.89	N/A	0	Inconclusive	No Call	2.57	No Call	4.63	No Call	0.81	Inconclusive	No Call						No Call						No Call
37	40	X0274907	4907	A. texanus	USA, Texas, Jeff Davis, 9.8 miles S Kent	15.8	300.2	50.086	No Call	86.1	N/A	0	45.53	45.53	No Call	250	25.85	25.85	36.56	36.56	No Call	285.072	18.74	18.74	38.48	38.48	Inconclusive	No Call	1.51	No Call	3.16	No Call	-0.85	Inconclusive	No Call						No Call						No Call
38	45	X1561923	1923	A. peninsularis	USA, California, Inyo, Westgard Pass	7.92	150.48	25.1064	No Call	185	37.61	37.61	N/A	0	No Call	417	14.46	14.46	N/A	0	No Call	230.631	20.64	20.64	33.67	33.67	Inconclusive	No Call	0.7	No Call	2.54	No Call	6.26	Inconclusive	No Call						No Call						No Call
39	48	X1562015	2015	A. peninsularis	USA, California, San Bernardino, 2 miles NW Yucca Valley, Burns Pinon Bridge Reserve	10.1	191.9	32.017	No Call	187	34.2	34.2	N/A	0	No Call	459	16.89	16.89	23.41	23.41	No Call	177.627	25.33	25.33	38.22	38.22	Inconclusive	No Call	2.51	No Call	3.69	No Call	4.47	Inconclusive	No Call						No Call						No Call
40	49	X1561970	1970	A. peninsularis	USA, California, San Bernardino, 2 miles NW Yucca Valley, Burns Pinon Bridge Reserve	4.42	83.98	14.0114	No Call	-5.02	N/A	0	N/A	0	No Call	90.9	N/A	0	39.89	39.89	No Call	80.0087	34.06	34.06	N/A	0	Inconclusive	No Call	5.64	No Call	1.11	No Call	-11.74	Inconclusive	No Call						No Call						No Call
41	56	X0270574	574	A. eugenii	USA, Texas, Medina, 5 miles N Castroville	18.3	347.7	58.011	No Call	19.7	N/A	0	N/A	0	No Call	8.13	N/A	0	17.13	17.13	No Call	53.4551	N/A	0	34.76	34.76	Inconclusive	No Call	5.58	No Call	7.97	No Call	1.27	Inconclusive	No Call						No Call						No Call
42	58	X0270573	573	A. eugenii	USA, Texas, Hidalgo, Weslaco, Rio Grande Valley	11.5	218.5	36.455	No Call	138	40.16	40.16	N/A	0	No Call	175	28.66	28.66	28.23	28.23	No Call	288.101	18	18	N/A	0	Inconclusive	No Call	3.05	No Call	4.1	No Call	3.01	Inconclusive	No Call						No Call						No Call
43	64	CN1	CN1	Conotrachelus nenuphar	USA, Oklahoma, Latimer	4.94	93.86	15.6598	No Call	342	21.54	21.54	N/A	0	No Call	145	35.84	35.84	26.29	26.29	No Call	127.632	29.48	29.48	40.29	40.29	Inconclusive	No Call	4.92	No Call	6.89	No Call	10.49	Inconclusive	No Call						No Call						No Call
44	65	CN2	CN2	Conotrachelus nenuphar	USA, Oklahoma, Latimer	16.2	307.8	51.354	No Call	289	25.87	25.87	N/A	0	No Call	449	14.41	14.41	27.54	27.54	No Call	350.117	17.38	17.38	45.11	45.11	Inconclusive	No Call	5.5	No Call	-3.18	No Call	3.52	Inconclusive	No Call						No Call						No Call
45	66	CN3	CN3	Conotrachelus nenuphar	USA, Vermont, Orange, 12 m. E of Chelsea	10.8	205.2	34.236	No Call	389	25.98	25.98	34.38	34.38	No Call	237	26.1	26.1	21.26	21.26	No Call	222.292	23.43	23.43	19.41	19.41	Inconclusive	No Call	-0.65	No Call	0.45	No Call	1.85	Inconclusive	No Call						No Call						No Call
46	68	CN5	CN5	Conotrachelus nenuphar	USA, Vermont, Orange, 12 m. E of Chelsea	78.8	1497.2	249.796	No Call	10.8	N/A	0	N/A	0	No Call	191	29.31	29.31	22.79	22.79	No Call	346.134	17.17	17.17	21.98	21.98	Inconclusive	No Call	5.42	No Call	8.08	No Call	3.69	Inconclusive	No Call						No Call						No Call
47	70	X1040131	131	Conotrachelus nenuphar	USA, Texas, Kaufman,Forney	6.9	131.1	21.873	No Call	-16.1	N/A	0	N/A	0	No Call	103	45.57	45.57	34.05	34.05	No Call	15.7648	N/A	0	29.34	29.34	Inconclusive	No Call	2.5	No Call	3.42	No Call	1.85	Inconclusive	No Call						No Call						No Call
48	71	TAMUIC-RL1	TRL1	Rhyssomatus lineaticollis	USA, Texas, Kleberg	37.6	714.4	119.192	No Call	6.14	N/A	0	N/A	0	No Call	-9.63	N/A	0	N/A	0	No Call	256.943	18.09	18.09	24.17	24.17	Inconclusive	No Call	2.96	No Call	13.4	No Call	8.33	Inconclusive	No Call						No Call						No Call
49	75	TAMUIC-RL5	TRL5	Rhyssomatus lineaticollis	USA, Texas, Jim Hogg	49.8	946.2	157.866	No Call	0.885	N/A	0	N/A	0	No Call	234	26.71	26.71	31.07	31.07	No Call	0.483995	N/A	0	N/A	0	Inconclusive	No Call	6.3	No Call	39.11	No Call	11.53	Inconclusive	No Call						No Call						No Call
50	78	TAMUIC-RL8	TRL8	Rhyssomatus lineaticollis	USA, Missouri, Barton	51.4	976.6	162.938	No Call	318	22.37	22.37	32.25	32.25	No Call	147	36.17	36.17	32.29	32.29	No Call	111.481	36.34	36.34	N/A	0	Inconclusive	No Call	-2.05	No Call	4.78	No Call	-0.92	Inconclusive	No Call						No Call						No Call
57	84	PW Box Vial 6	CC4	Curculio caryae	USA, Texas, Comanche County, Stallings Orchard	32.6	1597.4	266.342	No Call	560	16.15	16.15	32.53	32.53	No Call	164	33.23	33.23	32.43	32.43	No Call	236.215	23.83	23.83	38.33	38.33	Inconclusive	No Call	-2.22	No Call	2.06	No Call	4.88	Inconclusive	No Call						No Call						No Call
58	85	PW Box Vial 7	CC5	Curculio caryae	USA, Texas, Comanche County, Stallings Orchard	54.6	2675.4	446.082	No Call	490	19.34	19.34	45.62	45.62	No Call	395	22.69	22.69	23.1	23.1	No Call	238.498	19.88	19.88	39.27	39.27	Inconclusive	No Call	2.53	No Call	4.56	No Call	0.03	Inconclusive	No Call						No Call						No Call
59	86	PW Box Vial 8	CC6	Curculio caryae	USA, Texas, Comanche County, Stallings Orchard	32.6	1597.4	266.342	No Call	428	18.27	18.27	36.14	36.14	No Call	159	35.69	35.69	28.83	28.83	No Call	221.664	19.87	19.87	23.74	23.74	Inconclusive	No Call	4.02	No Call	3.22	No Call	0.1	Inconclusive	No Call						No Call						No Call
60	87	PW Box Vial 12	CC7	Curculio caryae	USA, Texas, Comanche County, Moore Orchard	42.2	2067.8	344.774	No Call	187	30.21	30.21	N/A	0	No Call	309	25.44	25.44	43.43	43.43	No Call	1321.21	30.66	30.66	31.63	31.63	Inconclusive	No Call	3.52	No Call	-2.19	No Call	6.03	Inconclusive	No Call						No Call						No Call
61	88	PW Box Vial 14	CC8	Curculio caryae	USA, Texas, Comanche County, Denman Orchard	64.2	3145.8	524.514	No Call	55.1	24.98	24.98	28.7	28.7	No Call	257	29.12	29.12	35.54	35.54	HET	829.319	29.72	29.72	N/A	0	Inconclusive	No Call	1.86	No Call	45.62	No Call	-0.42	Inconclusive	No Call						No Call						No Call
	38E			BW +C	USA, Texas, Dilley			~5ng/ul	BW	1047	27.04	27.04	22.35	22.35	BW	1078	26.19	26.19	21.37	21.37	BW	1124.77	25.88	25.88	21.12	21.12	BW	BW	5350.83	BW	4431.56	BW	4691.03	BW	BW	9873	27.8187	27.9937	21.388	21.4369	BW	11623	25.8673	26.0478	19.3543	19.3851	BW	11803	26.2715
	38H			BW +C	USA, Texas, Dilley			~5ng/ul	BW	1309	25.92	25.92	21.38	21.38	BW	1329	24.98	24.98	20.5	20.5	BW	1217.94	24.17	24.17	20.25	20.25	BW	BW	4716.94	BW	4707.85	BW	4967.16	BW	BW	9468	28.1686	27.9937	21.4859	21.4369	BW	11009	26.2283	26.0478	19.416	19.3851	BW	9280	27.31
	38G			BW +C	USA, Texas Dilley			~5ng/ul	BW	1552	24.62	24.62	21	21	BW	1555	23.28	23.28	20.1	20.1	BW	9445.87	23.38	23.38	20	20	BW	BW	4783.11	BW	4776.95	BW	5540.02	BW	BW	10123	25.26	25.53	21.67	21.85	BW	11824	22.44	22.67	19.6	19.67	BW	11080	23.22
	RX200306-002	20171121-001-B-001		TW +C	USA, New Mexico, Antelope Wells, Hidalgo County, 270 Acres			~5ng/ul	TW	15421	25.09	25.09	27.44	27.44	TW	14684	24.61	24.61	26.54	26.54	TW	9412.7	24.78	24.78	26.29	26.29	TW	TW	3810.12	TW	3659.36	TW	3689.68	TW	TW	8743	24.54	25.8	26.51	27.81	TW	10462	27.66	27.23	29.76	29.42	TW	10174	24.38
	RX200306-005	20171121-001-B-001		TW +C	USA, New Mexico, Antelope Wells, Hidalgo County, 270 Acres			~5ng/ul	TW	15248	26.24	26.24	28.77	28.77	TW	13579	26.31	26.31	28.21	28.21	TW	9127.8	25.62	25.62	27.55	27.55	TW	TW	3461.51	TW	3673.75	No Call	-4.44	TW	TW	9821	27.06	25.8	29.11	27.81	TW	8074	26.8	27.23	29.07	29.42	TW	9169	25.93
	RX210330-003	20171121-001-G-001		TW +C	USA, New Mexico, Antelope Wells, Hidalgo County, 270 Acres			~5ng/ul	TW	15201	24.33	24.33	26.72	26.72	TW	14792	24.02	24.02	26.01	26.01	TW	1386.61	23.97	23.97	25.44	25.44	TW	TW	3791.29	TW	3671.32	TW	3678.09	TW	TW	10792	26.29	26.75	28.8	29.31	TW	10542	27.05	27.55	29.66	30.15	TW	10845	24.75
				NTC					No Call	268	29.92	29.92	27.54	27.54	No Call	11.3	N/A	0	N/A	0	No Call	-11.3285	N/A	0	N/A	0	-	No Call	64	No Call	3.08	No Call	59.03	-	No Call						No Call						No Call
				NTC																							-	No Call	-0.62	No Call	-0.35	No Call	7.34	-
[truncated: 4 more columns]

## Sheet: Accuracy Test
							APHIS Mission Lab																									TAMU											USDA ARS
							Run 1								Run 2								Run 3								Final Determination	Run 1					Run 2					Final Determination	Run 1
Plate Well	DNA Prep #	Subspecies	Origin	Avg [DNA]	COI HAP	COI CLADE	SNP Call	RFU 1	RFU 2	Cq1	mean Cq1	Cq2	mean Cq2	deltaCq	SNP Call	RFU 1	RFU 2	Cq1	mean Cq1	Cq2	mean Cq2	deltaCq	SNP Call	RFU 1	RFU 2	Cq1	mean Cq1	Cq2	mean Cq2	deltaCq		SNP Call	RFU 1		RFU 2		SNP Call	RFU 1		RFU 2			SNP Call	RFU 1	RFU 2	Cq 1	mean Cq 1	Cq 2	mean Cq 2
A1	X080214-021	A. g. thurberiae	USA, Arizona, Kitt Peak Site Tohono O'odham, Indian Reservation	1.7022	AN17	TW	Heterozygote	4664	3385	33.39	33.39	35.49	35.49	2.1	Heterozygote	5053	3636	34.46	34.46	36.16	36.16	1.7	Heterozygote	5063	2495	34.05	34.05	36.74	36.74	2.69	Inconclusive	Heterozygote	1902.85	33.42	989.23	37.8	Heterozygote	2007.04	33.92	1164.28	37.72	Inconclusive	No Call	18.58	126.55	0	19.35	0	20.61
B1	X080214-022	A. g. thurberiae	USA, Arizona, Kitt Peak Site Tohono O'odham, Indian Reservation	1.87313	AN17	TW	Heterozygote	4473	2700	35.69	35.69	37.91	37.91	2.22	No Call	327	38.8	44.9	44.9	N/A	0		TW	3745	586	38.34	38.34	43.38	43.38	5.04	Inconclusive	No Call	5.33	N/A	6.77	N/A	No Call	762.25	37.04	177.5	N/A	Inconclusive	No Call	419.17	167.89	13.32	19.705	0	8.615
C1	X080214-023	A. g. thurberiae	USA, Arizona, Kitt Peak Site Tohono O'odham, Indian Reservation	1.42833	AN17	TW	No Call	6244	2366	32.99	32.99	36.15	36.15	3.16	Heterozygote	5599	3003	36.48	36.48	38.54	38.54	2.06	No Call	15.6	3.71	N/A	0	N/A	0		Inconclusive	TW	2804.34	30.65	915.94	37.15	TW	3608.59	30.16	912.46	37.07	TW	TW	2136.54	403.59	40.63	41.365	44.14	22.07
D1	X080214-024	A. g. thurberiae	USA, Arizona, Kitt Peak Site Tohono O'odham, Indian Reservation	1.59067	AN2	TW	TW	5570	904	35.53	35.53	40.45	40.45	4.92	No Call	-26.4	-16.6	N/A	0	N/A	0		No Call	11.8	7.69	N/A	0	N/A	0		Inconclusive	TW	2476.35	33.07	593.05	39.93	TW	2916.78	33.01	710.07	38.98	TW	No Call	277.28	65.53	43.94	21.97	0	0
E1	X080214-025	A. g. thurberiae	USA, Arizona, Kitt Peak Site Tohono O'odham, Indian Reservation	14.1967	AN2	TW	TW	7672	1779	28.48	28.48	33.14	33.14	4.66	TW	8066	1540	31.26	31.26	35.82	35.82	4.56	No Call	-12.2	-6.31	1.07	1.07	N/A	0		TW	TW	3743.19	27.3	1059.51	34.98	TW	4698.92	26.55	1459.01	33.07	TW	TW	8355.62	1837.67	28.91	14.455	33.2	16.6
F1	X080825-015	A. g. grandis	Mexico, Chihuahua, Delicias	2.70167	AN12	BW	BW	446	7487	33.28	33.28	28.07	28.07	5.21	No Call	637	605	14.81	14.81	44.54	44.54	29.73	BW	486	6034	33.38	33.38	31.41	31.41	1.97	BW	BW	89.15	N/A	5705.56	29.34	BW	82.65	N/A	7336.5	29.25	BW	No Call	213.2	207.43	21.45	20.265	0	13.875
G1	X080825-016	A. g. grandis	Mexico, Chihuahua, Delicias	21.61	AN12	BW	BW	631	8193	27.21	27.21	20.53	20.53	6.68	No Call	-47.6	242	40.51	40.51	N/A	0		Heterozygote	2573	1655	2.24	2.24	3.99	3.99	1.75	Inconclusive	BW	211.56	34.12	6341.16	21.79	BW	294.55	33.37	8095.75	21.55	BW	BW	542.04	14184.3	31.1	15.55	23.07	30.645
H1	X080825-017	A. g. grandis	Mexico, Chihuahua, Delicias	15.4533	AN12	BW	BW	349	7763	33.8	33.8	23.38	23.38	10.42	No Call	-7.22	2.21	N/A	0	N/A	0		Heterozygote	4997	3945	N/A	0	2.68	2.68		Inconclusive	BW	170.43	35.42	6695.78	22.96	BW	210.33	34.1	6104.8	23.13	BW	BW	-10.72	12846.5	0	13.685	29.89	29.69
A2	X080825-018	A. g. grandis	Mexico, Chihuhua, Ojinaga	7.194	AN12	BW	BW	308	9108	36.22	36.22	27.59	27.59	8.63	BW	757	9659	28.5	28.5	22.43	22.43	6.07	BW	627	6712	28.84	28.84	22.58	22.58	6.26	BW	BW	203.47	35.49	6219.7	24.05	BW	330.38	30.85	8126.46	23.98	BW	No Call	12.15	8.01	0	8.79	0	9.825
B2	X080825-019	A. g. grandis	Mexico, Chihuhua, Ojinaga	8.24033	AN12	BW	BW	492	7522	28.74	28.74	22.12	22.12	6.62	BW	708	8306	27.63	27.63	21.56	21.56	6.07	BW	654	6507	28.25	28.25	22	22	6.25	BW	BW	210.37	34.68	7369.77	23.29	BW	242.77	33.45	7188.44	23.47	BW	BW	539.35	14132.5	30	27.435	23.29	23.29
C2	X080825-020	A. g. grandis	Mexico, Chihuhua, Ojinaga	18.4367	AN12	BW	BW	1111	7552	22.82	22.82	21.14	21.14	1.68	BW	590	7734	27.44	27.44	20.41	20.41	7.03	BW	756	7320	27.08	27.08	20.83	20.83	6.25	BW	BW	227.33	33.69	6950.38	22.18	BW	205.93	35.72	6626.77	22.27	BW	BW	597.7	12847.2	28.01	28.55	22.74	24.54
D2	X080825-021	A. g. grandis	Mexico, Chihuhua, Ojinaga	2.19733	AN12	BW	BW	508	7756	31.66	31.66	26.97	26.97	4.69	BW	577	7937	31.17	31.17	27.01	27.01	4.16	BW	576	6753	32.79	32.79	27	27	5.79	BW	BW	143.41	37.39	6979.69	28.27	BW	168.34	36.27	6134.57	28.19	BW	BW	695.24	8502.06	13.7	24.88	35.3	32.15
E2	X080825-022	A. g. grandis	Mexico, Chihuhua, Ojinaga	3.97233	AN12	BW	BW	799	6515	25.86	25.86	23.49	23.49	2.37	BW	683	8577	29.52	29.52	23.14	23.14	6.38	BW	790	7057	28.68	28.68	23.3	23.3	5.38	BW	BW	341.93	24.73	7291.19	24.91	BW	292.18	30.61	8176.73	24.67	BW	No Call	-1.81	4.14	0	20.885	0	11.635
F2	X080214-016	A. g. grandis	USA, Texas, Rio Grande Valley	3.979	AN13	BW	BW	383	9183	34.75	34.75	30.4	30.4	4.35	BW	471	7508	33.33	33.33	25.33	25.33	8	BW	621	6611	30.94	30.94	24.57	24.57	6.37	BW	BW	173.3	36.8	7219.73	26.25	BW	228.55	35.8	7518.8	26.06	BW	BW	417.28	12646.5	32.11	30.17	28.51	26.5
G2	X080214-017	A. g. grandis	USA, Texas, Rio Grande Valley	9.40233	AN13	BW	BW	452	7011	28.95	28.95	22.69	22.69	6.26	BW	641	7873	29.21	29.21	22.41	22.41	6.8	BW	701	6623	28.15	28.15	22.58	22.58	5.57	BW	BW	216.9	33.66	6927.31	24.02	BW	264.72	32.62	7050.68	24	BW	No Call	320.63	150.78	18.63	21.04	0	16.925
H2	X080214-011	A. g. grandis	USA, Mississippi	11.3863	AN13	BW	BW	434	7069	29.39	29.39	21.36	21.36	8.03	BW	552	8088	29.67	29.67	21.32	21.32	8.35	BW	606	6366	29.07	29.07	21.72	21.72	7.35	BW	BW	65.37	N/A	7900.2	23.77	BW	296.59	29.6	6568.37	22.16	BW	BW	388.83	12763.2	32.59	30.36	25.9	24.155
A3	X080214-012	A. g. grandis	USA, Mississippi	22.39	AN13	BW	BW	447	7532	29.03	29.03	20.35	20.35	8.68	BW	725	8590	27.33	27.33	19.83	19.83	7.5	BW	733	7276	27.13	27.13	20.13	20.13	7	BW	BW	196.29	35	6533.14	21.48	BW	269.45	31.33	8113.99	21.39	BW	No Call	451.33	631.39	20.15	14.83	23.83	11.915
B3	X080825-001	A. g. thurberiae	Mexico, Chihuahua, Agua Prieta	1.70418	AN18	TW	TW	7913	2318	31.11	31.11	35.26	35.26	4.15	TW	9083	3810	31.81	31.81	34.49	34.49	2.68	TW	6239	1747	31.06	31.06	35.27	35.27	4.21	TW	TW	2559.81	32.04	541.77	N/A	TW	2828.24	31.98	622.91	39.61	TW	TW	2533.35	421.31	38.56	38.9	44.01	43.86
C3	X080825-002	A. g. thurberiae	Mexico, Chihuahua, Agua Prieta	1.0591	AN19	TW	TW	7120	1212	34.21	34.21	39.06	39.06	4.85	Heterozygote	5296	4969	35.03	35.03	36.05	36.05	1.02	TW	6551	2784	34.48	34.48	37.36	37.36	2.88	TW	TW	1954.94	34.3	456.82	N/A	TW	2772.28	33.07	668.41	39.41	TW	No Call	787.54	447.06	15.13	27.03	29.02	36.255
D3	X080825-003	A. g. thurberiae	Mexico, Chihuahua, Agua Prieta	2.2354	AN20	TW	TW	8121	1690	29.06	29.06	33.94	33.94	4.88	TW	8988	1804	30.06	30.06	34.25	34.25	4.19	TW	7733	1657	30	30	34.72	34.72	4.72	TW	TW	4239.79	28.15	1220.25	34.61	TW	4155.4	28.65	1145.44	35.26	TW	TW	4347.68	799.81	34.55	33.04	40.51	38.44
E3	X080825-004	A. g. thurberiae	Mexico, Chihuahua, Agua Prieta	0.882933	AN16	TW	TW	7133	1324	34.88	34.88	39.51	39.51	4.63	TW	6840	1108	36.41	36.41	40.4	40.4	3.99	Heterozygote	5555	2750	35.06	35.06	37.64	37.64	2.58	TW	TW	1848.93	34.84	441.36	N/A	TW	1925.33	34.31	435.06	N/A	TW	No Call	541.24	654.65	13.96	24.46	20.69	30.49
F3	X080825-005	A. g. thurberiae	Mexico, Chihuahua, Agua Prieta	0.910167	AN8	TW	TW	8335	1535	33.09	33.09	37.51	37.51	4.42	TW	7137	1158	34.23	34.23	38.42	38.42	4.19	TW	6634	1303	34.03	34.03	38.42	38.42	4.39	TW	No Call	6.81	N/A	12.83	N/A	No Call	-3.56	N/A	2.06	N/A	Inconclusive	TW	1242.23	281.41	36.02	37.03	45.32	43.97
G3	X080825-007	A. g. thurberiae	Mexico, Chihuahua, Agua Prieta	1.92033	AN16	TW	TW	6108	898	34.57	34.57	40.11	40.11	5.54	TW	6006	1588	34.73	34.73	38.4	38.4	3.67	TW	5733	1043	33.34	33.34	38.47	38.47	5.13	TW	TW	3300.27	31.42	684.05	38.99	TW	3415.7	30.6	786.76	38	TW	TW	5442.16	1020.61	35.07	34.78	40.1	39.655
H3	X080825-010	A. g. thurberiae	Mexico, Chihuahua, Agua Prieta	1.56333	AN17	TW	Heterozygote	6695	2981	33.13	33.13	36.06	36.06	2.93	TW	7255	1334	34.07	34.07	38.06	38.06	3.99	Heterozygote	3678	4536	36.03	36.03	36.47	36.47	0.44	Inconclusive	TW	3154.53	31.69	813.38	38.22	TW	3143.63	31.65	771.74	38.35	TW	No Call	127.05	294.5	44.22	37.8	39.62	38.96
A4	X080825-011	A. g. thurberiae	Mexico, Chihuahua, Agua Prieta	7.38433	AN21	TW	TW	6284	1444	28.06	28.06	33.41	33.41	5.35	TW	7090	1580	28.46	28.46	33.2	33.2	4.74	TW	6498	1499	29.15	29.15	34.12	34.12	4.97	TW	TW	4675.49	27.93	1331.5	34.47	TW	4525.29	27.55	1318.55	34.14	TW	TW	4077.3	1089.32	33.03	35.13	37.85	39.48
B4	BX081215-001	A. g. thurberiae	USA, Arizona, East of Sasabe, on US-MX Border	146.167	AN19	TW	TW	8768	2337	23.43	23.43	28.53	28.53	5.1	TW	9421	2438	24.68	24.68	28.94	28.94	4.26	TW	7247	1986	24.79	24.79	29.56	29.56	4.77	TW	TW	4766.17	25.25	1451.98	32.21	TW	4249.42	24.12	1409.69	31.44	TW	TW	7924.97	2705.07	24.62	26.75	28.16	30.215
C4	BX081215-002	A. g. thurberiae	USA, Arizona, East of Sasabe, on US-MX Border	27.5037	AN19	TW	TW	8504	2013	28.14	28.14	32.74	32.74	4.6	TW	9892	2186	29.64	29.64	33.89	33.89	4.25	TW	7280	1757	29.17	29.17	33.79	33.79	4.62	TW	No Call	-12.05	N/A	9.5	N/A	TW	3962.7	28.69	1110.67	35.49	TW	TW	8019.18	1827.07	33.34	32.795	36.8	36.36
D4	BX081215-003	A. g. thurberiae	USA, Arizona, East of Sasabe, on US-MX Border	14.3333	AN22	TW	TW	9828	2374	27	27	31.24	31.24	4.24	TW	10068	2383	27.86	27.86	32.04	32.04	4.18	TW	7776	1943	27.42	27.42	32.16	32.16	4.74	TW	TW	4045.59	28.76	1077.16	35.52	TW	4163.58	28.15	1220.44	34.56	TW	TW	2034.62	283.28	31.81	30.15	0	16.075
E4	BX081215-004	A. g. thurberiae	USA, Arizona, East of Sasabe, on US-MX Border	25.9567	AN19	TW	TW	9396	2307	26.2	26.2	30.83	30.83	4.63	TW	9791	2282	27.44	27.44	31.59	31.59	4.15	TW	5380	1554	25.71	25.71	31.13	31.13	5.42	TW	TW	4785.26	26.18	1571.12	32.34	TW	4949.13	26.36	1607.32	32.48	TW	TW	6190.15	1099.33	36.12	33.55	40.29	37.455
F4	BX081215-005	A. g. thurberiae	USA, Arizona, East of Sasabe, on US-MX Border	44.4067	AN19	TW	TW	9538	2305	26.24	26.24	31.13	31.13	4.89	TW	9705	2244	27.95	27.95	31.92	31.92	3.97	TW	6990	1774	27.63	27.63	32.23	32.23	4.6	TW	TW	5242.65	26.24	1688.39	32.28	TW	4276.6	26.16	1396.51	32.99	TW	TW	8228.14	2312.41	28.27	28.19	32.06	31.865
G4	BX081215-006	A. g. thurberiae	USA, Arizona, East of Sasabe, on US-MX Border	8.32	AN19	TW	TW	8886	2159	27.31	27.31	31.78	31.78	4.47	TW	9131	2190	28.14	28.14	32.15	32.15	4.01	TW	6460	1695	27.48	27.48	32.13	32.13	4.65	TW	TW	4430.56	28.07	1177.71	34.97	TW	3950.35	27.06	1181.67	34.02	TW	TW	7932.01	1429.46	34.59	33.885	38.73	37.995
H4	BX081215-007	A. g. thurberiae	USA, Arizona, East of Sasabe, on US-MX Border	33.73	AN8	TW	TW	7936	1870	26.75	26.75	31.5	31.5	4.75	TW	8381	2053	26.58	26.58	30.91	30.91	4.33	TW	6983	1716	27.43	27.43	32.31	32.31	4.88	TW	TW	4777.39	27.42	1417.46	33.62	TW	3973.99	27.31	1149.41	34.44	TW	TW	8579.13	2624.34	26.49	26.625	30.13	30.255
A5	BX081215-008	A. g. thurberiae	USA, Arizona, East of Sasabe, on US-MX Border	0.488433	AN19	TW	TW	6818	1332	32.18	32.18	36.96	36.96	4.78	TW	7272	1483	31.98	31.98	36.16	36.16	4.18	TW	6245	1378	32.07	32.07	36.64	36.64	4.57	TW	TW	3475.51	31.94	896.1	37.77	TW	2664.12	30.86	688.86	38.8	TW	TW	4085.1	669	39.05	30.325	43.23	40.17
B5	BX081215-009	A. g. thurberiae	USA, Arizona, East of Sasabe, on US-MX Border	3.34067	AN19	TW	TW	7331	1481	30.95	30.95	36.24	36.24	5.29	TW	8801	1709	31.98	31.98	36.16	36.16	4.18	TW	6991	1542	30.67	30.67	35.28	35.28	4.61	TW	TW	3367.78	31.66	844.12	38.04	TW	3451.37	30.19	877.5	37.3	TW	TW	5477.35	1317.77	32.65	16.325	37.01	38.86
C5	BX081215-010	A. g. thurberiae	USA, Arizona, East of Sasabe, on US-MX Border	19.01	AN19	TW	TW	9124	2185	27.33	27.33	32.01	32.01	4.68	TW	9322	2254	27.23	27.23	31.27	31.27	4.04	TW	7394	1844	27.55	27.55	32.22	32.22	4.67	TW	TW	5270.37	27.02	1621.68	33.01	TW	4520.89	27.3	1310.77	33.91	TW	TW	9286.6	2216.79	31.2	32.105	34.98	36.01
D5	BX081215-011	A. g. thurberiae	USA, Arizona, East of Sasabe, on US-MX Border	1.89047	AN20	TW	TW	8559	2020	28.18	28.18	32.75	32.75	4.57	TW	9696	2163	29.16	29.16	33.15	33.15	3.99	TW	5622	1473	28.13	28.13	33.28	33.28	5.15	TW	TW	4287.08	28.03	1275.23	34.46	TW	3427.09	27.45	1008.01	35.26	TW	TW	6887.31	1427.21	34.05	32.94	38	36.75
E5	BX081215-012	A. g. thurberiae	USA, Arizona, East of Sasabe, on US-MX Border	28.1667	AN19	TW	TW	9423	2315	26.05	26.05	30.77	30.77	4.72	TW	9828	2380	26.55	26.55	30.71	30.71	4.16	TW	7088	1856	26.35	26.35	31.03	31.03	4.68	TW	TW	4508.09	25.03	1381.7	32.29	TW	3632.91	24.53	1169.89	32.77	TW	TW	9189.87	3191.42	31.73	29.7	34.58	32.675
F5	BX081103-004	A. g. grandis	Mexico, Chihuhua, Delicias	249.733	AN12	BW	BW	677	8519	26.92	26.92	21.06	21.06	5.86	BW	741	8048	26.02	26.02	20.88	20.88	5.14	BW	600	6212	28.17	28.17	21.15	21.15	7.02	BW	BW	236.65	33.57	8139.72	22.06	BW	244.46	30.2	5546.88	22.21	BW	BW	1245.64	12476.7	26.74	25.155	23.13	22.125
G5	BX081103-005	A. g. grandis	Mexico, Chihuhua, Delicias	67.5967	AN12	BW	BW	658	8631	28.22	28.22	23.19	23.19	5.03	BW	908	7552	26.26	26.26	23.07	23.07	3.19	BW	636	6286	29.26	29.26	23.1	23.1	6.16	BW	BW	231.71	33.47	7703.21	24.16	BW	364.84	29.14	8107.61	24.34	BW	BW	1414.61	11650.5	25.94	25.86	23.11	23.23
H5	BX081103-006	A. g. grandis	Mexico, Chihuhua, Delicias	51.4707	AN12	BW	BW	267	7617	35.89	35.89	27.76	27.76	8.13	BW	353	7662	35.44	35.44	27.6	27.6	7.84	BW	292	5604	38.15	38.15	28.35	28.35	9.8	BW	BW	25.08	N/A	9100.41	30.37	BW	214.34	34.39	6552.03	29	BW	BW	1148.07	10374.4	30.08	30.145	27.44	27.44
A6	BX081103-007	A. g. grandis	Mexico, Chihuhua, Delicias	26.98	AN12	BW	BW	487	7694	30.39	30.39	24.18	24.18	6.21	BW	479	8491	32.89	32.89	23.91	23.91	8.98	BW	609	5496	28.89	28.89	24.07	24.07	4.82	BW	BW	323.55	29.12	9375.05	25.34	BW	220.44	33.85	6702.51	25.26	BW	BW	1211.35	10713.6	26.27	26.875	23.58	23.83
B6	BX081103-008	A. g. grandis	Mexico, Durango Area	400.6	AN12	BW	BW	739	8446	24.36	24.36	19.49	19.49	4.87	BW	775	8603	24.99	24.99	19.18	19.18	5.81	BW	743	6578	25.16	25.16	19.42	19.42	5.74	BW	BW	290.13	30.78	7392.26	20.94	BW	335.41	29.72	6533.84	21.02	BW	BW	1415.68	12362.2	23.33	21.045	19.92	19.895
C6	BX081103-009	A. g. grandis	Mexico, Durango Area	161.933	AN12	BW	BW	805	8526	24.79	24.79	20.32	20.32	4.47	BW	726	9046	27.2	27.2	20.13	20.13	7.07	BW	883	6006	24.29	24.29	20.37	20.37	3.92	BW	BW	261.26	31.69	6114.66	21.85	BW	294.32	30.63	6706.63	22.03	BW	BW	1469.14	12816.4	23.63	23.25	20.41	20.33
D6	BX081103-001	A. g. thurberiae	Mexico, Agua Prieta	119.6	AN14	TW	TW	9267	2277	24.83	24.83	29.8	29.8	4.97	TW	9283	1805	29.28	29.28	34.21	34.21	4.93	TW	7039	2006	25.64	25.64	30.33	30.33	4.69	TW	TW	5686.03	25.41	1872.43	31.62	TW	5270.06	24.08	1834.37	30.26	TW	TW	10542	3259.49	25.38	27.075	29.16	30.71
E6	BX081103-002	A. g. thurberiae	Mexico, Agua Prieta	31.9833	AN15	TW	TW	9509	2186	26.19	26.19	30.98	30.98	4.79	TW	9379	2189	27.38	27.38	31.62	31.62	4.24	TW	7208	1813	27.31	27.31	31.94	31.94	4.63	TW	TW	5329.8	25.93	1562.76	32.47	TW	4410.03	25.95	1332.01	32.92	TW	TW	10924.8	2918.41	27.69	28.665	31.71	32.715
F6	BX081103-003	A. g. thurberiae	Mexico, Agua Prieta	16.18	AN16	TW	TW	9711	2217	26.58	26.58	31.26	31.26	4.68	TW	9308	2111	27.42	27.42	31.69	31.69	4.27	TW	7468	1827	27.64	27.64	32.38	32.38	4.74	TW	TW	4442.34	29.53	1075.79	36.24	TW	4024.27	27.24	1075.43	34.95	TW	TW	10183.4	3011.51	27.45	28.33	31.12	31.97
G6	VX100310-001	A. g. grandis	Mexico, Chihuahua, Delicias	33.87	AN12	BW	BW	587	7021	27.28	27.28	24.93	24.93	2.35	BW	248	6933	37.49	37.49	24.92	24.92	12.57	BW	349	5900	34.68	34.68	25.08	25.08	9.6	BW	BW	127.52	36.93	6648.62	25.86	BW	279.25	30.45	6425.02	26.02	BW	BW	691.79	10995.5	35.28	31.74	30.45	27.78
H6	VX100310-005	A. g. grandis	Mexico, Chihuahua, Delicias	11.2853	AN12	BW	BW	237	6133	36.47	36.47	28.13	28.13	8.34	BW	193	6959	41.91	41.91	29.79	29.79	12.12	BW	201	4619	40.98	40.98	29.27	29.27	11.71	BW	No Call	27.98	N/A	168.44	N/A	No Call	-3.24	N/A	11.22	N/A	Inconclusive	BW	-13.64	281.06	0	0	0	0
A7	VX100310-006	A. g. grandis	Mexico, Chihuahua, Delicias	2.21133	AN12	BW	BW	367	7382	34.04	34.04	26.06	26.06	7.98	BW	518	8194	32.6	32.6	25.57	25.57	7.03	BW	474	5649	32.57	32.57	25.77	25.77	6.8	BW	BW	163.05	36.98	9415.6	29.15	BW	148.74	37.74	6886.95	29.09	BW	BW	-3.44	78.99	0	6.45	0	0
B7	VX100317-001	A. g. grandis	USA, Texas, Progreso	3.727	AN10	BW	BW	396	8395	31.25	31.25	25.09	25.09	6.16	BW	362	8931	34.73	34.73	25.36	25.36	9.37	No Call	259	159	29.72	29.72	N/A	0		BW	BW	18.44	N/A	6304.26	25.95	BW	53.78	N/A	4492.35	26.72	BW	BW	615.67	10686.6	38.94	36.64	34.03	32.145
C7	VX100317-002	A. g. grandis	USA, Texas, Progreso	3.68233	AN13	BW	BW	39.2	3051	N/A	0	39.07	39.07		No Call	13.2	11.4	N/A	0	N/A	0		No Call	16.5	14	N/A	0	N/A	0		Inconclusive	BW	43.02	N/A	7827.52	29.78	BW	209.23	34.89	5943.78	27.96	BW	BW	178.98	3571.66	45.94	43.3	40.34	38.105
D7	VX100317-003	A. g. grandis	USA, Texas, Progreso	2.59133	AN9	BW	BW	461	8520	30.53	30.53	25.21	25.21	5.32	BW	508	9120	32.74	32.74	25.08	25.08	7.66	BW	400	6396	33.55	33.55	25.14	25.14	8.41	BW	BW	148.63	38.27	7108.98	26.23	BW	131.18	38.09	6260.58	26.51	BW	Heterozygote	748.73	666.38	17.36	8.68	26.88	13.44
E7	VX100317-005	A. g. grandis	USA, Texas, Progreso	24.88	AN27	BW	No Call	320	73.8	19.25	19.25	N/A	0		BW	166	6498	45.04	45.04	39	39	6.04	No Call	290	86.2	23.83	23.83	N/A	0		Inconclusive	BW	10.31	N/A	1593.64	38.27	No Call	17.72	N/A	4.26	N/A	BW	Heterozygote	869.57	587.04	18.46	31.37	29.97	14.985
F7	VX100310-010	A. g. thurberiae	Mexico, Chihuahua, Agua Prieta	6.438	AN19	TW	No Call	587	346	17.99	17.99	41.91	41.91	23.92	TW	9221	1791	30.06	30.06	34.29	34.29	4.23	TW	6371	1180	33.23	33.23	38.08	38.08	4.85	TW	TW	3897.76	31.25	984.28	37.05	TW	3704.7	29.3	1086.69	35.68	TW	No Call	330.06	573.08	29.52	22.56	29.69	26.09
G7	VX100310-009	A. g. thurberiae	Mexico, Chihuahua, Agua Prieta	2.14827	AN4	TW	TW	6568	1010	33.77	33.77	39.17	39.17	5.4	No Call	1510	1325	41.68	41.68	42.75	42.75	1.07	No Call	-26.6	-10.4	N/A	0	N/A	0		Inconclusive	TW	4170.9	29.84	1071.63	36.23	TW	3474.5	30.25	906.64	37.11	TW	Heterozygote	413.01	406.06	25.51	12.755	39.25	36.975
H7	VX100310-011	A. g. thurberiae	Mexico, Chihuahua, Agua Prieta	2.62257	AN4	TW	TW	7363	1575	30.25	30.25	35.04	35.04	4.79	TW	8372	1699	31.21	31.21	35.33	35.33	4.12	TW	5595	1212	31.5	31.5	36.43	36.43	4.93	TW	TW	3720.04	30.01	1026.02	36.28	TW	3637.27	30.38	952.38	36.99	TW	Heterozygote	469.47	459.75	23.86	34.815	36.11	18.055
A8	VX100310-013	A. g. thurberiae	USA, Arizona, Phoenix	2.913	AN26	TW	TW	5843	904	31.91	31.91	37.9	37.9	5.99	No Call	1868	277	41.15	41.15	N/A	0		No Call	144	75.3	45.97	45.97	N/A	0		Inconclusive	TW	4277.26	29.46	1107.95	35.91	TW	3939.41	29.6	1025.92	36.2	TW	BW	-4.43	8.7	0	9.015	0	22.27
B8	VX100310-014	A. g. thurberiae	USA, Arizona, Phoenix	6.72133	AN17	TW	TW	7518	1254	29.71	29.71	35.55	35.55	5.84	TW	8098	1229	31.51	31.51	36.72	36.72	5.21	No Call	178	116	39.88	39.88	N/A	0		TW	TW	4382.51	28.02	1137.32	34.98	TW	3895.21	28.28	951.34	35.95	TW	Heterozygote	1621.61	878.8	12.17	6.085	21.99	10.995
C8	VX100310-016	A. g. thurberiae	USA, Arizona, Phoenix	3.06867	AN17	TW	TW	8161	1365	29.93	29.93	35.32	35.32	5.39	TW	8098	1284	31.26	31.26	36.06	36.06	4.8	TW	6384	1146	31.32	31.32	36.81	36.81	5.49	TW	TW	4275.02	28.41	1149.98	35.3	TW	3814.77	28.91	978.08	36.11	TW	Heterozygote	230.02	193.25	34.93	25.005	0	11.57
D8	VX100317-012	A. g. thurberiae	USA, Arizona, Kitt Peak Site Tohono O'odham, Indian Reservation	6.49567	AN17	TW	TW	8466	1709	28.5	28.5	33.59	33.59	5.09	TW	9091	1579	32.11	32.11	36.57	36.57	4.46	No Call	-9.96	0.405	N/A	0	N/A	0		TW	TW	4127.07	26.64	1170.55	34.06	TW	4066.98	27.96	1141.87	34.9	TW	TW	-9.44	-7.4	0	9.01	0	0
E8	VX100317-004	A. g. grandis	USA, Texas, Progreso	2.04067	AN13	BW	BW	486	8975	31.43	31.43	27.01	27.01	4.42	BW	483	9102	33.03	33.03	26.99	26.99	6.04	BW	361	6534	35.43	35.43	27.05	27.05	8.38	BW	BW	67.19	N/A	6504.49	27.49	BW	42.47	N/A	6056.5	27.8	BW	BW	404.3	8832.43	32.11	33.7	28.1	28.67
F8	VX100310-015	A. g. thurberiae	USA, Arizona, Phoenix	2.868	AN26	TW	TW	8139	1406	29.8	29.8	35.09	35.09	5.29	TW	8814	1525	30.45	30.45	35.02	35.02	4.57	TW	6554	1191	30.73	30.73	36.11	36.11	5.38	TW	TW	3782.47	28.61	920.89	36.29	TW	3742.63	29.64	831.18	37.38	TW	TW	5762.05	1208.47	35.7	35.7	40.86	40.86
G8	VX100310-017	A. g. thurberiae	USA, Arizona, Phoenix	2.397	AN17	TW	TW	6797	1033	30.16	30.16	36.35	36.35	6.19	TW	7058	1058	31.96	31.96	37.13	37.13	5.17	TW	6226	990	32.21	32.21	37.9	37.9	5.69	TW	TW	3504.6	27.33	690.54	38.22	Heterozygote	3437.41	30.37	2093.98	34.18	TW	Heterozygote	7257.96	2736.13	32.95	31.76	36.9	37.055
H8	VX100317-011	A. g. thurberiae	USA, Arizona, Kitt Peak, Tohono O'odham, IR	7.184	AN19	TW	No Call	1466	128	40.41	40.41	N/A	0		No Call	825	390	6.39	6.39	31.19	31.19	24.8	No Call	4.27	8.32	N/A	0	N/A	0		Inconclusive	TW	4402.29	27.78	1146.38	34.93	TW	4083.94	28.44	1070.42	35.55	TW	TW	7676.86	1448.08	33.83	30.18	39.15	36.115
A9	VX100415-020	A. g. grandis	USA, Mississippi, Meyersville, Issaquena County	3.33133	AN9	BW	No Call	435	522	8.52	8.52	44.74	44.74	36.22	No Call	511	-13.2	11.38	11.38	N/A	0		No Call	-6.48	2.27	N/A	0	N/A	0		Inconclusive	BW	53.97	N/A	6407.5	27.06	BW	51.94	N/A	6015.72	27	BW	BW	129.14	7653.75	44.51	44.51	37.17	37.17
B9	VX100415-021	A. g. grandis	USA, Mississippi, Meyersville, Issaquena County	3.09067	AN1	BW	No Call	112	0.907	41.57	41.57	N/A	0		No Call	463	-11.2	12.59	12.59	N/A	0		No Call	374	-1.05	15.52	15.52	N/A	0		Inconclusive	No Call	-7.81	N/A	9.61	N/A	No Call	-7.47	N/A	-0.2	N/A	Inconclusive	-
C9	VX100519-047	A. g. thurberiae	USA, Arizona, Chiricahua, Mts.F152, Monitoring Site S of San Simon	2.052	AN18	TW	TW	8501	1626	28.39	28.39	33.61	33.61	5.22	TW	8528	1612	29.26	29.26	33.98	33.98	4.72	TW	7029	1420	29.3	29.3	34.67	34.67	5.37	TW	TW	3688.88	27.62	912.46	35.93	TW	3973.85	28.2	1021.23	35.66	TW	TW	8531.48	1604.62	33.35	32.185	38.84	37.935
D9	VX100519-048	A. g. thurberiae	USA, Arizona, Chiricahua, Mts.F152, Monitoring Site S of San Simon	4.103	AN24	TW	TW	8714	1998	27.86	27.86	32.46	32.46	4.6	TW	8653	1884	29.02	29.02	33.29	33.29	4.27	TW	7115	1661	28.66	28.66	33.42	33.42	4.76	TW	TW	4138.96	27.3	1168.41	34.4	TW	4412.99	28.88	1181.17	35.38	TW	TW	10056.3	2203.4	27.08	28.31	33.32	35.035
E9	VX100519-049	A. g. thurberiae	USA, Arizona, Chiricahua, Mts.F152, Monitoring Site S of San Simon	3.04533	AN18	TW	TW	8769	1716	28.62	28.62	33.71	33.71	5.09	TW	8531	1643	29.92	29.92	34.45	34.45	4.53	TW	7001	1442	29.39	29.39	34.59	34.59	5.2	TW	TW	4659	27.36	1324.61	34.05	TW	4144.82	29.01	1091.61	35.77	TW	TW	8574.37	1875.11	32.7	32.7	37.9	37.9
F9	VX100525-061	A. g. thurberiae	USA, Arizona, Kitt Peak Site Tohono O'odham, Indian Reservation	8.67033	AN4	TW	TW	8282	1374	27.47	27.47	33.47	33.47	6	TW	8138	1287	28.91	28.91	34.28	34.28	5.37	TW	5897	1022	28.95	28.95	35.28	35.28	6.33	TW	TW	4583.31	25.63	1174.67	33.53	TW	4340.4	27.08	1131.33	34.58	TW	TW	6279.29	1081.17	34.15	30.16	41.26	39.115
G9	VX100519-055	A. g. thurberiae	USA, Arizona, Sonoita, Site C; 10.5 mi S of juct' SR 83 & I-10 (Site C)	2.66533	AN20	TW	TW	8306	1470	28.96	28.96	34.34	34.34	5.38	TW	7768	1349	30.11	30.11	34.94	34.94	4.83	TW	5974	1124	30.38	30.38	35.85	35.85	5.47	TW	TW	4039.44	27.92	1070.81	35.37	TW	3977.52	29.02	1033.45	35.83	TW	TW	8086.72	1781.35	31.32	31.205	36.97	37.71
H9	VX100519-062	A. g. thurberiae	USA, Arizona, Sonoita, Site B; 8 mi S of juct' SR 83 & I-10 (Site B)	2.13867	AN17	TW	TW	6706	1184	30.34	30.34	35.77	35.77	5.43	TW	6942	1213	31.75	31.75	36.58	36.58	4.83	TW	5244	1054	30.4	30.4	36.09	36.09	5.69	TW	TW	3758.63	28.72	1028.04	35.75	TW	3977.72	29.74	1015.69	36.5	TW	-
A10	VX100519-046	A. g. thurberiae	USA, Arizona, Chiricahua Mts.F152, monitoring site S of San Simon	4.147	AN23	TW	TW	6761	1514	27.55	27.55	32.79	32.79	5.24	Heterozygote	6827	6078	8.95	8.95	22.81	22.81	13.86	Heterozygote	6099	1013	20.26	20.26	25.66	25.66	5.4	Inconclusive	TW	4397.31	27.42	1192.86	34.49	TW	3714.63	27.54	988.87	35.53	TW	-
B10	VX100519-056	A. g. thurberiae	USA, Arizona. Sonoita, Site C; 10.5 mi S of juct' SR 83 & I-10 (Site C)	12.6627	AN24	TW	TW	6992	1126	29.67	29.67	35.7	35.7	6.03	TW	7792	1226	31.51	31.51	36.55	36.55	5.04	TW	6296	1144	31.19	31.19	37.08	37.08	5.89	TW	TW	2683.03	32.15	503.38	N/A	TW	2973.69	31.09	609.27	39.7	TW	-
C10	VX100519-061	A. g. thurberiae	USA, Arizona, Sonoita, Site B; 8 mi S of juct' SR 83 & I-10 (Site B)	1.65623	AN8	TW	TW	7730	1384	28.51	28.51	34.34	34.34	5.83	TW	8886	1497	29.63	29.63	34.75	34.75	5.12	TW	601	7013	30.39	30.39	36.09	36.09	5.7	TW	TW	4089.48	28.71	1068.55	35.53	TW	4005.05	29.52	976.97	36.55	TW	TW	8542.47	1540.17	32.73	32.2	38.94	37.735
D10	VX100528-016	A. g. grandis	Mexico, Durango, Jimenez	1.707	AN12	BW	BW	615	8613	30.97	30.97	26.72	26.72	4.25	BW	617	8775	32.22	32.22	26.4	26.4	5.82	BW	-7.49	-0.535	32.68	32.68	27.18	27.18	5.5	BW	BW	214.2	34.78	7227.95	27.93	BW	60.8	N/A	5834.71	28.28	BW	BW	668.57	13159.5	30.9	32.53	27.41	28.09
E10	VX100526-006	A. g. grandis	Mexico, Chihuahua, Durango, Torreon	5.61367	AN12	BW	BW	754	8443	25.79	25.79	23.9	23.9	1.89	BW	537	10643	33.2	33.2	25.72	25.72	7.48	No Call	476	6355	N/A	0	N/A	0		BW	BW	221.76	33.85	7073.73	27.67	BW	205.94	34.85	7607.12	27.81	BW	BW	826.12	13544.6	27.22	27.565	25.65	25.7
F10	VX100526-007	A. g. grandis	Mexico, Chihuahua, Durango, Torreon	4.89667	AN12	BW	BW	583	8467	28.9	28.9	24.08	24.08	4.82	BW	577	8843	30.42	30.42	23.93	23.93	6.49	BW	561	5942	31.65	31.65	24.03	24.03	7.62	BW	BW	35.64	N/A	7343.48	25.65	BW	46.18	N/A	7327.55	25.65	BW	BW	628.7	13557.1	30.57	29.53	26.26	26.155
G10	VX100526-008	A. g. grandis	Mexico, Chihuahua, Durango, Torreon	3.08733	AN12	BW	BW	698	8146	27.69	27.69	24.03	24.03	3.66	BW	770	8584	28.88	28.88	23.58	23.58	5.3	BW	20.7	1094	30.35	30.35	23.97	23.97	6.38	BW	BW	265.2	31	7225.61	25.25	BW	357.66	28.97	7326.26	25.41	BW	BW	737.18	14906.6	28.1	28.625	24.53	24.48
H10	VX100528-007	A. g. grandis	Mexico, Coahuila, Ejido Chavez	1.65387	AN12	BW	BW	313	7094	34.01	34.01	27.01	27.01	7	BW	316	8402	38.03	38.03	30.49	30.49	7.54	No Call	24.9	11.6	N/A	0	43.22	43.22		BW	BW	150.85	37.43	6625.73	28.21	BW	245.77	33.17	6833.8	28.38	BW	BW	212.48	10038.6	40.24	40.24	34.6	34.6
A11	VX100528-008	A. g. grandis	Mexico, Coahuila, Ejido Chavez	4.38133	AN12	BW	No Call	154	101	33.74	33.74	N/A	0		No Call	176	74.8	37.19	37.19	N/A	0		No Call	2.47	4.48	5.86	5.86	N/A	0		Inconclusive	BW	34.06	N/A	6609.55	29.21	BW	35.24	N/A	5614.34	29.4	BW	BW	360.81	11084.7	33.61	34.545	32.64	32.555
B11	VX100528-010	A. g. grandis	Mexico, Coahuila, Ejido Chavez	1.83367	AN4	TW	BW	411	7626	33.28	33.28	28.19	28.19	5.09	BW	283	8778	38.87	38.87	29.28	29.28	9.59	No Call	47.2	23.6	N/A	0	N/A	0		BW	BW	26.62	N/A	6037.84	30.11	BW	59.95	N/A	6757.66	30.15	BW	BW	776.15	14123.5	30.16	26.655	28.68	28.805
C11	VX100528-012	A. g. grandis	Mexico, Coahuila, Ejido Chavez	5.15567	AN25	BW	BW	354	6839	31.53	31.53	30.07	30.07	1.46	BW	191	7758	42.55	42.55	31.86	31.86	10.69	No Call	341	6407	N/A	0	N/A	0		BW	BW	42.51	N/A	6322.24	30.25	BW	17.98	N/A	6221.36	30.21	BW	-
D11	VX100526-012	A. g. grandis	Mexico, Coahuila, San Pedro (bet' Torreo &)	3.66567	AN12	BW	BW	347	8284	32.08	32.08	25.22	25.22	6.86	BW	322	8799	34.62	34.62	25.28	25.28	9.34	BW	419	6640	34.65	34.65	25.44	25.44	9.21	BW	BW	79.03	N/A	6631.48	25.94	BW	260.45	31.43	7438.4	26.04	BW	-
E11	VX100526-013	A. g. grandis	Mexico, Coahuila, San Pedro (bet' Torreo &)	3.678	AN12	BW	BW	717	8469	28.03	28.03	24.21	24.21	3.82	BW	531	8520	31.98	31.98	23.86	23.86	8.12	BW	290	5648	35.28	35.28	26.14	26.14	9.14	BW	BW	206.1	36.1	7160.31	27.15	BW	81.46	N/A	8423.26	27.26	BW	BW	504.75	11568.7	31.34	32.78	25.46	25.69
F11	VX100526-001	A. g. grandis	Mexico, Chihuahua, Durango, Torreon	3.43	AN11	BW	BW	291	7295	32.56	32.56	25.67	25.67	6.89	BW	376	8496	33.19	33.19	25.53	25.53	7.66	BW	198	5519	35.93	35.93	25.65	25.65	10.28	BW	BW	218.74	33.69	7393.18	26.71	BW	82.9	N/A	6145.83	26.68	BW	-
G11	VX100526-002	A. g. grandis	Mexico, Chihuahua, Durango, Torreon	4.74833	AN12	BW	BW	214	7240	36.53	36.53	26.42	26.42	10.11	BW	154	7338	43.81	43.81	27.63	27.63	16.18	BW	504	6017	41.15	41.15	26.41	26.41	14.74	BW	BW	284.51	30.08	7301.63	25.5	BW	89.75	N/A	7798.57	25.95	BW	BW	718.2	13612.4	28.34	26.515	25.87	25.63
H11	RX101213-004	A. g. grandis	USA, New Mexico, Artesia	4.37133	AN1	BW	BW	502	7498	28.74	28.74	23.65	23.65	5.09	BW	356	8436	36.91	36.91	27.93	27.93	8.98	BW	1732	236	30.93	30.93	23.6	23.6	7.33	BW	BW	238.95	33.98	6389	24.86	No Call	45	N/A	89.85	N/A	BW	BW	1017.9	13685.1	24.26	24.145	25.38	24.77
A12	RX200930-009	Pos C	Mexico, Chihuahua, Delicias				BW	594	7625	28.63	28.63	22.64	22.64	5.99	No Call								BW	3046	4702	N/A	0	2.03	2.03
B12	RX200930-010	Pos C	Mexico, Chihuahua, Delicias				BW	609	7675	29.31	29.31	24.26	24.26	5.05	BW	723	9030	29.76	29.76	23.97	23.97	5.79	No Call	-34	-19.5	18.93	18.93	21.26	21.26	2.33
C12	RX200930-011	Pos C	Mexico, Chihuahua, Ojinaga, Distrito de Riego				BW	755	7529	24.91	24.91	20.7	20.7	4.21	BW	809	8192	25.69	25.69	20.26	20.26	5.43	BW	2610	12425	24.39	24.39	19.85	19.85	4.54
D12	RX170927-014	Pos C	USA, New Mexico, Hidalgo County				No Call	-	-	24.45	24.45	20.31	20.31	4.14	TW	7868	1561	31.18	31.18	35.48	35.48	4.3	No Call			30.53	30.53	N/A	0
E12	RX170927-016	Pos C	USA, New Mexico, Hidalgo County				No Call	-	-	25.86	25.86	20.9	20.9	4.96	No Call								No Call			21.54	21.54	23.54	23.54	2
F12	RX170927-017	Pos C	USA, New Mexico, Hidalgo County				TW	7830	1598	28.86	28.86	33.91	33.91	5.05	No Call								No Call			43.75	43.75	N/A	0
G12		NEG C					-	19	16.3	N/A	0	N/A	0		-			37.66	37.66	4.73	4.73	32.93	-			N/A	0	N/A	0
H12		NEG C					-	23.8	17.4	N/A	0	N/A	0		-	111	63.2	N/A	0	N/A	0		-
A1	RX101213-001	A. g. thurberiae	USA, Arizona, Bisbee, Site F; 2.4 mi S of juct' SR 80 & 90	23.5547	AN20	TW	TW	6139	1215	29.64	29.64	39.72	39.72	10.08	TW	5123	978	29.88	29.88	39.33	39.33	9.45	TW	4330	1056	30.44	30.44	38.57	38.57	8.13	TW	TW	4381.7	29.17	1195.68	35.31	TW	3434.75	31.54	891.79	37.72	TW	TW	6192.1	1193.92	34.78	23.39	41.08	41.08
B1	RX101213-003	A. g. thurberiae	USA, Arizona, Kitt Peak Site Tohono O'odham, Indian Reservation	4.64233	AN8	TW	TW	6240	1119	28.45	28.45	39.68	39.68	11.23	TW	5380	1012	28.33	28.33	38.25	38.25	9.92	TW	5080	1162	29.62	29.62	37.65	37.65	8.03	TW	TW	3933	29.76	990.24	36.64	TW	3383.23	30.05	886.26	37.18	TW	TW	8965.82	1895.11	31.2	30.72	37.25	36.66
C1	VX100528-017	A. g. grandis	Mexico, Durango, Jimenez	9.48633	AN12	BW	BW	267	7149	30.8	30.8	29.64	29.64	1.16	BW	877	5654	N/A	0	29.16	29.16		No Call	-18.6	-0.952	37.87	37.87	N/A	0		BW	BW	151.63	37.66	5856.78	30.73	BW	61.8	N/A	5733.12	30.8	BW	BW	363.72	12705.3	35.41	29.46	28.5	28.5
D1	VX100528-018	A. g. grandis	Mexico, Durango, Jimenez	2.536	AN12	BW	BW	451	7488	28.99	28.99	28.16	28.16	0.83	BW	359	5610	29.11	29.11	27.91	27.91	1.2	BW	334	5958	33.66	33.66	31.32	31.32	2.34	BW	BW	166.64	36.21	6437.86	28.17	BW	61.1	N/A	5822.79	28.14	BW	BW	915.39	13020.9	28.64	27.94	27.39	27.86
E1	VX100528-021	A. g. grandis	Mexico, Durango, Jimenez	7.22633	AN12	BW	BW	354	8273	31.3	31.3	29.87	29.87	1.43	BW	416	5985	28.7	28.7	28.19	28.19	0.51	BW	206	5409	37.24	37.24	36.39	36.39	0.85	BW	BW	257.62	33.09	6654.57	29.36	BW	96.2	N/A	6182.57	29.38	BW	BW	970.85	12598.8	27.18	26.93	27.83	27.78
F1	VX100528-024	A. g. grandis	Mexico, Durango, Jimenez	3.04267	AN4	TW	No Call	-3.89	-0.123	10.98	10.98	N/A	0		No Call	600	255	N/A	0	N/A	0		No Call	1185	653	N/A	0	26.73	26.73		Inconclusive	BW	5.81	N/A	2261.38	36.08	BW	-6.47	N/A	1419.04	37.78	BW	-
G1	VX100527-015	A. g. grandis	Mexico, Chihuahua, Los Alamos, (KM 92)	10.9227	AN4	TW	BW	294	6440	30.29	30.29	28.76	28.76	1.53	BW	254	5035	30.85	30.85	28.38	28.38	2.47	BW	323	4460	30.91	30.91	28.32	28.32	2.59	BW	BW	122.5	37.87	6430.52	28.9	BW	58.39	N/A	6292.28	28.93	BW	BW	644.96	11707.9	34.03	31.96	28.52	28.945
H1	VX100527-016	A. g. grandis	Mexico, Chihuahua, Los Alamos, (KM 92)	2.707	AN4	TW	BW	49.5	2334	18.5	18.5	42.12	42.12	23.62	Heterozygote	2674	2432	14.03	14.03	24.59	24.59	10.56	No Call	7.19	6.29	43.65	43.65	N/A	0		Inconclusive	BW	94.37	N/A	5834.64	30.81	BW	26.71	N/A	5280.56	30.6	BW	BW	250.67	8134.38	37.37	30.04	33.17	33.48
A2	VX100527-017	A. g. grandis	Mexico, Chihuahua, Los Alamos, (KM 92)	2.427	AN12	BW	BW	573	6754	N/A	0	31.89	31.89		BW	143	5465	33.02	33.02	31.23	31.23	1.79	BW	176	5080	32.9	32.9	30.41	30.41	2.49	BW	BW	23.49	N/A	6487.39	29.9	BW	12	N/A	6175.9	29.85	BW	No Call	291.75	-2.39	5.86	5.86	0	0
B2	VX100527-019	A. g. grandis	Mexico, Chihuahua, Los Alamos, (KM 92)	2.646	AN12	BW	BW	481	7151	25.21	25.21	26.95	26.95	1.74	BW	456	5708	25.26	25.26	26.45	26.45	1.19	BW	502	5095	26.6	26.6	26.74	26.74	0.14	BW	BW	139.11	38.9	7530.39	27.64	BW	185.2	34.48	6890.98	27.87	BW	BW	354.44	7107.49	31.57	31.81	26.18	26.715
C2	VX100528-011	A. g. grandis	Mexico, Coahuila, Ejido Chavez	2.94667	AN4	TW	No Call	-13.2	-2.34	37.78	37.78	N/A	0		No Call	268	241	10.01	10.01	N/A	0		No Call	2.1	7	N/A	0	N/A	0		Inconclusive	BW	101.01	N/A	6611.4	29.99	BW	46.7	N/A	5302.59	29.94	BW	BW	482.22	11568.4	30.57	31.14	29.26	29.195
D2	RX101213-002	A. g. grandis	USA, Mississippi, Tupelo	3.342	AN1	BW	BW	548	7403	23.63	23.63	26.49	26.49	2.86	BW	547	5697	23.48	23.48	26.08	26.08	2.6	BW	679	5397	24.91	24.91	26.16	26.16	1.25	BW	BW	209.19	35.27	7195.3	26.88	BW	234.53	33.32	7616.56	27.08	BW	BW	645.5	12217.9	30.86	30.33	26.37	26.285
E2	RX110804-001	A. g. grandis	Mexico, Chihuahua, Meoqui, Delicias	1.9245	AN12	BW	BW	502	6936	23.17	23.17	26.75	26.75	3.58	BW	502	6325	24.32	24.32	26.43	26.43	2.11	BW	561	5072	25.51	25.51	26.41	26.41	0.9	BW	BW	155.91	37.02	7299.02	27.17	BW	224.18	33.42	6307.59	27.18	BW	BW	593.23	11384.5	29.51	24.37	25.8	32.235
F2	RX110705-004	A. g. grandis	Mexico, Chihuahua, Ojinaga	1.6196	AN12	BW	BW	496	6908	25.47	25.47	25.83	25.83	0.36	BW	458	5653	25.7	25.7	25.55	25.55	0.15	BW	596	5390	26.43	26.43	25.74	25.74	0.69	BW	BW	278.73	32.07	8057.93	26.25	BW	306.94	28.51	7038.68	26.41	BW	BW	510.29	13138.7	31.41	32.55	26.13	28.55
G2	RX110705-005	A. g. grandis	Mexico, Chihuahua, Ojinaga	2.06967	AN12	BW	BW	566	7324	26.24	26.24	26.11	26.11	0.13	BW	432	5404	25.52	25.52	25.79	25.79	0.27	BW	573	5452	27.03	27.03	26.13	26.13	0.9	BW	BW	132.7	38.54	6240.52	26.43	BW	144.62	37.1	6972.94	26.69	BW	BW	601.31	12808.8	30.34	30.01	25.68	25.91
H2	RX110705-006	A. g. grandis	Mexico, Chihuahua, Ojinaga	20.2543	AN12	BW	BW	315	6549	28.08	28.08	26.34	26.34	1.74	BW	302	5160	27.97	27.97	26.22	26.22	1.75	BW	327	4728	29.19	29.19	26.27	26.27	2.92	BW	BW	86.25	N/A	6831.56	26.74	BW	194.73	36.27	7150.5	26.58	BW	BW	874.7	12490.2	26.07	27.91	25.68	26.17
A3	RX110705-001	A. g. thurberiae	Mexico, Chihuahua, Highway Janos Aqua Prieta	0.688667	?????	?????	No Call	12.5	4.37	45.94	45.94	N/A	0		TW	1804	161	35.22	35.22	N/A	0		No Call	840	87	40.73	40.73	N/A	0		Inconclusive	TW	2165.91	33.56	530.02	N/A	TW	2409.45	32.27	593.11	39.9	TW	TW	6519.04	1270.19	36.72	38.13	42.73	41.81
B3	RX110705-002	A. g. thurberiae	Mexico, Chihuahua, Aqua Prieta, Highway Janos	1.09557	AN16	TW	TW	6912	1227	29.28	29.28	39.78	39.78	10.5	TW	5231	930	21.79	21.79	38.98	38.98	17.19	TW	5364	1068	30.79	30.79	38.8	38.8	8.01	TW	TW	2057.04	33.29	403.55	N/A	TW	2915.71	31.73	691.39	38.98	TW	TW	8988.33	1924.54	32.88	31.68	39.71	38.75
C3	RX110705-003	A. g. thurberiae	Mexico, Chihuahua, Aqua Prieta, Highway Janos	0.867767	AN14	TW	TW	6870	1094	31.13	31.13	41.39	41.39	10.26	TW	5931	986	30.42	30.42	39.85	39.85	9.43	TW	5743	1107	31.17	31.17	39.38	39.38	8.21	TW	TW	2021.87	33.62	479.41	N/A	TW	2577.5	32.62	637.7	39.52	TW	TW	8484.21	1820.11	33.66	34.7	39.88	40.985
D3	RX110804-002	A. g. grandis	Mexico, Chihuahua, Meoqui, Delicias	0.998067	?????	?????	BW	210	5698	31.4	31.4	39.85	39.85	8.45	No Call	237	88.6	10.17	10.17	N/A	0		No Call	259	212	12.96	12.96	N/A	0		Inconclusive	No Call	5.16	N/A	80.04	N/A	No Call	4.21	N/A	94.58	N/A	Inconclusive	BW	239.22	9478.83	40.93	40.96	37.73	37.85
E3	RX110804-003	A. g. grandis	Mexico, Chihuahua, Meoqui, Delicias	2.61743	?????	?????	No Call	-3.45	-0.0876	23.32	23.32	N/A	0		No Call	-3.01	0.544	N/A	0	N/A	0		No Call	134	78.9	20.12	20.12	N/A	0		Inconclusive	No Call	13.75	N/A	40.56	N/A	No Call	-5.71	N/A	6.81	N/A	Inconclusive	No Call	-8.48	115.52	0	0	0	0
F3	BX120301-011	A. g. grandis	Mexico, Tamaulipas, between Valle Hermoso and Rio Bravo	1.97213	AN30	BW	BW	482	7606	30.94	30.94	33.13	33.13	2.19	BW	456	6167	32.19	32.19	32.58	32.58	0.39	BW	499	5691	33.02	33.02	32.36	32.36	0.66	BW	BW	172.97	34.49	5782.24	33.87	BW	36.02	N/A	3823.85	33.35	BW	BW	468.98	12746.5	35.54	35.04	33.08	33.05
G3	BX120301-012	A. g. grandis	Mexico, Tamaulipas, between Valle Hermoso and Rio Bravo	1.31233	AN1	BW	BW	438	7052	26.85	26.85	28.69	28.69	1.84	BW	535	5948	26.7	26.7	28.27	28.27	1.57	BW	581	5743	29.21	29.21	28.43	28.43	0.78	BW	BW	153.49	36.79	6552.66	29.16	BW	132.95	38.19	5774.86	29.11	BW	BW	879.28	14568.1	29.75	29.14	28.31	28.32
H3	BX120301-013	A. g. grandis	Mexico, Tamaulipas, between Valle Hermoso and Rio Bravo	0.579633	AN1	BW	BW	376	6273	29.74	29.74	28.56	28.56	1.18	BW	440	5590	28.53	28.53	28.15	28.15	0.38	BW	432	4546	29.72	29.72	28.32	28.32	1.4	BW	BW	140.87	37.8	6774.99	28.13	BW	234.54	33.63	6754.53	28.06	BW	BW	1048.23	12764.3	15.56	23.26	28.11	28.2
A4	BX120301-014	A. g. grandis	Mexico, Tamaulipas, between Valle Hermoso and Rio Bravo	0.556667	AN1	BW	BW	352	6672	31.35	31.35	31.87	31.87	0.52	BW	280	5373	31.26	31.26	31.59	31.59	0.33	BW	359	5244	33.13	33.13	32.03	32.03	1.1	BW	BW	163.62	35.77	5411.04	32.15	BW	151.46	37.65	5585.7	31.77	BW	BW	542.83	12944.9	34.37	35.32	32.06	32.55
B4	BX120301-015	A. g. grandis	Mexico, Tamaulipas, between Valle Hermoso and Rio Bravo	6.47567	AN28	BW	BW	338	7198	28.09	28.09	30.11	30.11	2.02	BW	372	6241	27.76	27.76	30.1	30.1	2.34	BW	361	5410	30.83	30.83	29.96	29.96	0.87	BW	BW	292.06	26.58	5713.36	31.22	BW	200.56	33.84	5593.33	30.97	BW	BW	486.92	11963.5	33.53	33.53	30.26	15.13
C4	BX120301-016	A. g. grandis	Mexico, Tamaulipas, between Valle Hermoso and Rio Bravo	1.48223	AN28	BW	BW	320	7567	30.06	30.06	30.46	30.46	0.4	BW	330	5817	24.92	24.92	30.41	30.41	5.49	BW	379	5716	30.76	30.76	29.95	29.95	0.81	BW	BW	126.52	39.11	4957.87	31.01	BW	157.5	33.95	5264.22	30.76	BW	BW	248.86	9982.78	37.25	37.36	34.14	33.91
D4	BX120301-017	A. g. grandis	Mexico, Tamaulipas, between Valle Hermoso and Rio Bravo	1.628	AN1	BW	BW	418	7666	24.5	24.5	29.34	29.34	4.84	BW	329	6085	24.61	24.61	29.06	29.06	4.45	BW	473	5861	28.77	28.77	28.81	28.81	0.04	BW	BW	150.84	37.69	6158.56	30.21	BW	166.98	35.57	6454.14	30.22	BW	BW	625.88	12134.5	30.85	30.85	29.28	14.64
E4	BX120301-018	A. g. grandis	Mexico, Tamaulipas, between Valle Hermoso and Rio Bravo	0.7063	AN1	BW	BW	327	7503	28.73	28.73	29.51	29.51	0.78	BW	362	6022	26.57	26.57	29.15	29.15	2.58	BW	403	5317	28.47	28.47	29.28	29.28	0.81	BW	BW	173.81	34.49	5859.63	30.18	BW	123.75	38.81	6112.21	30.16	BW	BW	720.26	13120.8	31.3	29.89	29.25	29.205
F4	BX120301-019	A. g. grandis	Mexico, Tamaulipas, between Valle Hermoso and Rio Bravo	15.206		No Call	BW	389	7382	31.92	31.92	31.96	31.96	0.04	BW	439	6249	30.17	30.17	31.19	31.19	1.02	BW	537	5945	31.28	31.28	31.59	31.59	0.31	BW	BW	128.65	38.12	5138.31	31.81	BW	154.82	34.68	4497.49	32.35	BW	BW	584.91	13688.9	32.53	25.9	31.22	15.61
G4	BX120301-020	A. g. grandis	Mexico, Tamaulipas, between Valle Hermoso and Rio Bravo	0.9399		No Call	BW	296	6895	33.68	33.68	34.27	34.27	0.59	BW	163	4890	37.04	37.04	36.05	36.05	0.99	BW	365	5167	34.12	34.12	34.41	34.41	0.29	BW	BW	108.33	39.09	3477.23	35.54	BW	157.04	36.51	4796.03	33.69	BW	BW	463.5	10507.2	38.65	37.74	35.71	35.08
B6	BX120217-001	A. g. grandis	USA, Texas, Harlingen	2.45833	AN27	BW	No Call	-0.956	-0.379	37.91	37.91	38.01	38.01	0.1	No Call	-11.3	-1.3	N/A	0	N/A	0		No Call	6.08	64.1	N/A	0	N/A	0		Inconclusive	No Call	108.95	N/A	119.01	N/A	No Call	6.47	N/A	5.51	37.33	Inconclusive	No Call	-33.59	-14.05	0	0	0	0
C6	BX120217-002	A. g. grandis	USA, Texas, Harlingen	3.29333	AN27	BW	No Call	4.28	3.21	16.78	16.78	N/A	0		No Call	-8.86	-1.38	N/A	0	N/A	0		No Call	-0.134	4.34	17.59	17.59	N/A	0		Inconclusive	No Call	1.7	N/A	13.47	N/A	No Call	8.1	N/A	9.8	N/A	Inconclusive	No Call	429.58	574.9	18	18	0	0
D6	BX120217-003	A. g. grandis	USA, Texas, Harlingen	1.75433	AN28	BW	BW	521	7902	33.61	33.61	39.11	39.11	5.5	BW	496	6529	N/A	0	N/A	0		BW	560	5916	16.31	16.31	N/A	0		BW	BW	248.92	28.64	6270.06	28.53	BW	84.81	N/A	6361.34	28.63	BW	BW	676.37	12729.6	30.01	30.63	27.48	27.565
E6	BX120217-004	A. g. grandis	USA, Texas, Harlingen	1.64097	AN27	BW	BW	338	7837	16.92	16.92	N/A	0		BW	301	6354	13.8	13.8	N/A	0		BW	407	5953	24.04	24.04	N/A	0		BW	BW	51.36	N/A	6945.66	30.99	BW	150.82	36.72	5805.6	30.87	BW	-
F6	BX120217-005	A. g. grandis	USA, Texas, Harlingen	2.01033	AN27	BW	BW	421	8003	N/A	0	N/A	0		BW	408	6691	N/A	0	N/A	0		BW	430	5667	38.74	38.74	38.87	38.87	0.13	BW	BW	122.88	39.33	6837	29.63	BW	116.14	39.5	6310.15	29.88	BW	-
G6	BX120217-006	A. g. grandis	USA, Texas, Harlingen	1.74	AN28	BW	BW	544	7487	12.33	12.33	N/A	0		BW	543	6255	13.62	13.62	N/A	0		BW	715	8327	27.04	27.04	N/A	0		BW	BW	245.72	32.98	7322.73	27.24	BW	130.79	38.25	6413.06	27.44	BW	-
H6	BX120217-007	A. g. grandis	USA, Texas, Harlingen	3.405	AN27	BW	No Call	-2.07	3.79	11.77	11.77	N/A	0		BW	156	4477	N/A	0	N/A	0		BW	158	3843	N/A	0	N/A	0		BW	BW	149.22	34.6	2404.15	37.12	BW	24.38	N/A	2243.31	37.35	BW	-
A7	BX120217-008	A. g. grandis	USA, Texas, Harlingen	10.83	AN28	BW	BW	247	8204	8.21	8.21	N/A	0		BW	350	5488	10.13	10.13	N/A	0		BW	469	5034	N/A	0	N/A	0		BW	BW	259.83	32.44	6640.22	28.33	BW	181.01	36.27	6575.32	28.37	BW	-
B7	BX120217-009	A. g. grandis	USA, Texas, Harlingen	2.28	AN27	BW	No Call	1.36	6.16	N/A	0	N/A	0		No Call	0.899	4.69	N/A	0	N/A	0		BW	277	4995	3.96	3.96	N/A	0		Inconclusive	No Call	4.69	N/A	15.99	N/A	No Call	0.12	N/A	9.26	N/A	Inconclusive	-
C7	BX120217-010	A. g. grandis	USA, Texas, Harlingen	9.629	AN31	BW	BW	409	7837	29.84	29.84	N/A	0		BW	390	6454	N/A	0	N/A	0		BW	496	5556	N/A	0	N/A	0		BW	BW	170.25	36.33	6395.14	28.87	BW	166.4	35.88	6208.03	28.77	BW	-
D7	rx200930-009	Pos C	Mexico, Chihuahua, Delicias				BW	870	8355	N/A	0	N/A	0		BW	805	6914	N/A	0	N/A	0		BW	849	5981	37.86	37.86	37.84	37.84	0.02				26.76		22.82			32.07		22.65
E7	RX200930-010	Pos C	Mexico, Chihuahua, Delicias				BW	825	8535	26.51	26.51	27.83	27.83	1.32	BW	678	6732	26.68	26.68	27.45	27.45	0.77	BW	776	6197	26.6	26.6	27.75	27.75	1.15				35.43		23.98			34.56		23.93
F7	RX200930-011	Pos C	Mexico, Chihuahua, Ojinaga, Distrito de Riego				BW	971	7910	21.91	21.91	23.21	23.21	1.3	BW	825	6953	20.95	20.95	23.02	23.02	2.07	BW	872	6250	21.3	21.3	22.97	22.97	1.67				29.99		23.37			33.01		23.33
G7	RX170927-014	Pos C	USA, New Mexico, Hidalgo County				No Call	-	-	23.88	23.88	24.96	24.96	1.08	TW	6140	1259	24.21	24.21	24.64	24.64	0.43	No Call	-3.71	-1.64	24.24	24.24	24.61	24.61	0.37				24.27		30.72			23.62		31.08
H7	RX170927-016	Pos C	USA, New Mexico, Hidalgo County				No Call	-	-	17.09	17.09	21.39	21.39	4.3	TW	3901	470	19.31	19.31	21.07	21.07	1.76	TW	5321	1438	21.06	21.06	21.12	21.12	0.06				25.27		32.01			24.91		32.13
A8	RX170927-017	Pos C	USA, New Mexico, Hidalgo County				TW	6782	1504	16.85	16.85	21.1	21.1	4.25	TW	5378	1335	27.11	27.11	36.56	36.56	9.45	TW	4928	1385	N/A	0	N/A	0					24.65		31.39			24.95		32.08
B8	NTC						-	10.1	12.5	20.2	20.2	21.75	21.75			463	399	31.92	31.92	44.95	44.95	13.03		8.44	154	26.3	26.3	34.11	34.11	7.81				31.86		N/A			N/A		N/A
C8	NTC						-	6.61	6.11	26.05	26.05	36.38	36.38			6.89	4.74	25.24	25.24	34.91	34.91	9.67		2.34	5.86	26.28	26.28	34.48	34.48	8.2				N/A		N/A			N/A		N/A
D8	NTC						-	223	-1.55	N/A	0	N/A	0			3.61	3.78							15	10.4	N/A	0	N/A	0
E8	NTC						-	-6.95	-0.541							287	259							228	0.674			N/A	0
F8	NTC						-	-9.7	1.29							104	13.3							249	-1.13
G8	NTC						-	262	-0.198							24.3	27.5							243	-2.63
H8	NTC						-	319	-3.83							290	1.4							-9.69	-0.86
[truncated: 10 more columns]
